1 A fine-tuned vector-parasite dialogue in tsetse's cardia determines peritrophic  
2 matrix integrity and trypanosome transmission success

3  
4

5 Aurélien Vigneron<sup>1\*</sup>, Emre Aksoy<sup>1,#a</sup>, Brian L Weiss<sup>1</sup>, Xiaoli Bing<sup>1,#b</sup>, Xin Zhao<sup>1,#c</sup>, Erick O  
6 Awuoche<sup>1,#d</sup>, Michelle O'Neill<sup>1</sup>, Yineng Wu<sup>1</sup>, Geoffrey M Attardo<sup>1,#e</sup>, Serap Aksoy<sup>1</sup>

7

8 <sup>1</sup>Department of Epidemiology of Microbial Diseases, Yale School of Public Health, New Haven,  
9 Connecticut, United States of America

10

11 <sup>#a</sup>Current Address: Graduate Program in Genetics, Genomics and Bioinformatics, University of  
12 California Riverside, Riverside, California, United States of America

13 <sup>#b</sup>Current Address: Department of Entomology, Cornell University, Ithaca, New York, United  
14 States of America

15 <sup>#c</sup>Current Address: CAS Key Laboratory of Pathogenic Microbiology and Immunology, Institute  
16 of Microbiology, Chinese Academy of Sciences, Beijing, China

17

18 <sup>#d</sup>Current Address: Department of Agriculture, School of Agriculture and Food Science, Meru  
19 University of Science and Technology, Meru, Kenya

20

21 <sup>#e</sup>Current Address: Department of Entomology and Nematology, University of California Davis,  
22 Davis, California, United States of America

23

24

25

26

27

28

29

30

31

32

\*Corresponding author

E-mail: aurelien.vigneron@yale.edu (AV)

Keywords: tsetse; trypanosome; peritrophic matrix; reactive oxygen species; vector-parasite  
interaction

## 33 **Abstract**

34 Arthropod vectors have multiple physical and immunological barriers that impede the  
35 development and transmission of parasites to new vertebrate hosts. These include the peritrophic  
36 matrix (PM), a chitinous barrier that separates the blood bolus from the midgut epithelia and  
37 modulates the vector-microbiota interactions. In tsetse flies, a sleeve-like PM is continuously  
38 produced by the cardia organ located at the fore- and midgut junction. During their development  
39 in tsetse, African trypanosomes have to bypass the PM twice: first to colonize the midgut and  
40 then to reach the salivary glands (SG). However, not all flies with midgut infections develop  
41 mammalian transmissible SG infections - the reasons for which are unclear. Here, we used  
42 transcriptomics, microscopy and functional genomics analyses to dissect the factors that regulate  
43 parasite migration from midgut to SG. In flies with midgut infections only, parasites are cleared  
44 at the cardia by reactive oxygen intermediates (ROIs) at the expense of collateral cytotoxic  
45 damage to the cardia. In flies with midgut and SG infections, gene expression for components of  
46 the PM is reduced and structural integrity of the barrier is compromised. Under these  
47 circumstances trypanosomes traverse through the layers of the PM by aggregating into cyst-like  
48 bodies. The process of PM attrition that enables the parasites to reenter into the midgut lumen to  
49 move forward to SG is apparently mediated by components of the parasites residing in the cardia.  
50 Thus, a fine-tuned dialogue between tsetse and trypanosomes at the cardia determines the  
51 outcome of PM integrity and trypanosome transmission success.

52

## 53 **Author summary**

54 Insects are responsible for transmission of parasites that cause deadly diseases in humans and  
55 animals. Understanding the key factors that enhance or interfere with parasite transmission  
56 processes can result in new control strategies. Here, we report that a proportion of tsetse flies with  
57 African trypanosome infections in their gut can prevent the parasites from migrating to the  
58 salivary glands, albeit at the expense of collateral damage. In a subset of flies with gut  
59 infections, the parasites manipulate the integrity of the gut barrier, called the peritrophic matrix,  
60 and reach the salivary glands for transmission to the next mammal. Either targeting parasite  
61 manipulative processes or enhancing peritrophic matrix integrity could reduce parasite  
62 transmission.

## 63 **Introduction**

64 Insects are essential vectors for the transmission of microbes that cause devastating diseases in  
65 humans and livestock. Many of these diseases lack effective vaccines and drugs for control in the  
66 mammalian hosts. Hence, reduction of insect populations, as well as approaches that reduce the  
67 transmission efficiency of pathogens in insect vectors, are explored for disease control. Tsetse  
68 flies transmit African trypanosomes, which are the causative agents of human and animal African  
69 trypanosomiasis. These diseases can be fatal if left untreated and inflict significant socio-  
70 economic hardship across a wide swath of sub-Saharan Africa [1, 2]. The phenomenon of  
71 antigenic variation the parasite displays in its mammalian host has prevented the development of  
72 vaccines, and easily administered and affordable drugs are unavailable. However, tsetse  
73 population reduction can significantly curb disease, especially during times of endemicity [3, 4].  
74 In addition, strategies that reduce parasite transmission efficiency by the tsetse vector can prevent  
75 disease emergence. A more complete understanding of parasite-vector dynamics is essential for  
76 the development of such control methods.

77 For transmission to new vertebrate hosts, vector-borne parasites have to first successfully  
78 colonize their respective vectors. This requires that parasites circumvent several physical and  
79 immune barriers as they progress through their development in the vector. One prominent barrier  
80 they face in the midgut is the peritrophic matrix (PM), which is a chitinous, proteinaceous  
81 membrane that separates the epithelia from the blood meal [5-7]. In *Anopheles* mosquito the  
82 presence of the PM benefits the vector by regulating the commensal gut microbiota and  
83 preventing the microbes from invading the hemocoel [8]. In tsetse and sand flies, the PM plays a  
84 crucial role as an infection barrier by blocking parasite development and colonization [9, 10]. The  
85 presence of the PM can also be exploited by microbes to promote their survival in the gut lumen.  
86 The agents of Lyme disease, *Borrelia burgdorferi*, bind to the tick vector gut and exploit the PM  
87 for protection from the harmful effects of blood-filled gut lumen [11]. Unlike the adult female  
88 mosquito gut that produces a type I PM in response to blood feeding, tsetse's sleeve-like type II  
89 PM is constitutively produced by the cardia organ, which is located at the junction of the fore-  
90 and midgut. Upon entering the gut lumen, long-slender bloodstream (BSF) trypanosomes are  
91 lysed while short-slender BSFs differentiate to midgut-adapted procyclic forms (PCF) [12].  
92 During these lysis and differentiation processes, BSF parasites shed their dense coat of variant  
93 surface glycoproteins (VSGs) into the midgut environment [12]. These molecules are internalized

94 by cells in the cardia, where they transiently inhibit the production of a structurally robust PM.  
95 This process promotes infection establishment by enabling trypanosomes to traverse the PM  
96 barrier and invade the midgut ectoperitrophic space (ES) [9]. After entering the ES, trypanosomes  
97 face strong epithelial immune responses, which hinder parasite gut colonization success.  
98 Detection of PCF parasites in the ectoperitrophic space induces the production of trypanocidal  
99 antimicrobial peptides [13, 14], reactive oxygen intermediates (ROIs) [15], PGRP-LB [16] and  
100 tsetse-EP protein [17]. These immune effectors eliminate trypanosomes from the majority of  
101 flies. In the end, only in a small percentage of flies PCF parasites remain in the midgut and move  
102 to the cardia. They next differentiate into long and short epimastigote forms and have to reenter  
103 the gut lumen to migrate through the foregut into the salivary glands (SG), where they  
104 differentiate to mammalian infective metacyclic forms [18, 19]. However, only a percentage of  
105 flies that have midgut infections will go on to develop SG infections that are necessary for  
106 disease transmission. The physiological mechanisms that prevent midgut parasites from infecting  
107 the SG remain unknown.

108 In this study, we investigated the molecular and cellular mechanisms that enable the  
109 parasites to escape from the ectoperitrophic space of the midgut for successful SG colonization.  
110 Our results show that tsetse can restrict parasite survival in the cardia via induction of oxidative  
111 stress, although this resistance is costly and results in extensive damage to cellular physiology. In  
112 contrast, tolerance to parasite transmission represents a more homeostatic state and requires that  
113 the parasites successfully bypass the PM barrier in the cardia. We discuss the molecular  
114 interactions that regulate this complex and dynamic vector-parasite relationship in the cardia, an  
115 essential organ for disease transmission.

116

## 117 **Results and Discussion**

### 118 **Trypanosome infection dynamics in tsetse**

119 Tsetse display resistance to infection with trypanosomes. Following ingestion, parasites  
120 successfully colonize the midgut and cardia of only a small percentage of flies. Furthermore, not  
121 all gut infections give rise to mature metacyclics in the SG, in which case transmission to a  
122 subsequent vertebrate host fails (Fig 1A). Hence, two forms of fly infections exist: non-  
123 permissive infections when parasites are restricted exclusively to the gut (hereafter designated  
124 ‘inf+/-’), and permissive infections where parasites are present in the gut and SGs (hereafter  
125 designated ‘inf+/+’) (Fig 1B). Why only some of the midgut-infected tsetse individuals support  
126 trypanosome colonization of the SGs remains unknown. To begin addressing this question, we  
127 investigated whether parasites from non-permissive (inf+/-) gut infections suffer a bottleneck that  
128 results in the selection of cells that lack the ability to progress in development to metacyclic  
129 infections in the SG. We challenged two groups of teneral adults (newly eclosed) *per os* with  
130 *Trypanosoma brucei brucei* parasites obtained from midguts of either inf+/+ or inf+/- flies. We  
131 observed a similar proportion of inf+/+ and inf+/- phenotypes regardless of the initial parasite  
132 population (inf+/+ or inf+/-) used for challenge (Fig 1C). This result indicates that trypanosomes  
133 in the inf+/- gut population are developmentally competent, and can give rise to SG metacyclics.  
134 Thus, we reasoned that the cardia physiological environment may determine the developmental  
135 course of trypanosome infection dynamics.

136

### 137 **Parasites bypass the PM and enter into the gut lumen in permissive (inf+/+) cardia**

138 To investigate the molecular aspects of the crucial bottleneck that limits parasite transmission in  
139 the inf+/- group, we fed mammalian BSF parasites (*Trypanosoma brucei brucei* RUMP 503) to  
140 teneral adults and 40 days later dissected and pooled infected cardia into inf+/- and inf+/+ groups  
141 ( $n=3$  biological replicates per group, with 10 cardia per replicate). For comparison, we similarly  
142 obtained dissected cardia from age-matched normal controls (called non-inf;  $n=3$  biological  
143 replicates per group, with 10 cardia per replicate). We next applied high-throughput RNA-  
144 sequencing (RNA-seq) to profile the gene expression in the three groups of cardia. We obtained  
145 on average > 23M reads for each of the 9 libraries, with 77.8% (non-inf), 75.4% (inf+/-) and  
146 64.5% (inf+/+) of the total reads mapping to *Glossina morsitans morsitans* transcriptome (S1  
147 Fig). The trypanosome reads corresponded to about 3.5% in non-permissive (inf+/-) dataset and

148 about 11.9% in the permissive (*inf+/+*) dataset (Fig 2A). We measured relative parasite density in  
149 *inf+/-* and *inf+/+* cardia by quantitative real time PCR (qRT-PCR) using the trypanosome  
150 housekeeping gene *gapdh* normalized to tsetse *gapdh*. We found significantly higher parasite  
151 density in *inf+/+* cardia compared to *inf+/-* cardia (Student t-test,  $p=0.0028$ ; Fig 2B). We  
152 confirmed that *inf+/+* cardia had higher parasite density by counting trypanosome numbers in the  
153 cardia using a hemocytometer (S2 Fig). Thus, the difference in the representative parasite  
154 transcriptome reads in the two infected groups of cardia is due to an increase in the number of  
155 trypanosomes in the *inf+/+* cardia rather than an increase in parasite transcriptional activity.  
156 Interestingly, we noted no difference in the number of trypanosomes present in *inf+/-* and *inf+/+*  
157 midguts (S2 Fig). Hence, it appears that the decrease in parasite density occurs in the cardia  
158 despite the fact that similar densities are maintained in the midgut.

159 Tsetse's cardia is composed of several different cell-types with potentially varying  
160 functions (schematically shown in Fig 2C; S3 Fig) [20-22]. These include cells originating from  
161 the foregut, which are enclosed within a glandular structure formed by secretory cells originating  
162 from the midgut. The organ is surrounded by muscles that form a sphincter around the foregut,  
163 which likely regulates blood flow during the feeding process. Additionally, large lipid-containing  
164 cells are localized under a layer of muscle below the sphincter, the function of which remains  
165 unclear. Microscopy analysis of infected cardia supported our previous molecular findings as we  
166 observed fewer parasites in the cardia of *inf+/-* (Fig 2D) compared to *inf+/+* flies (Fig 2E).  
167 Parasites from *inf+/-* cardia were restricted to the ES, whereas *inf+/+* cardia had parasites in both  
168 the ES and in the lumen. Hence, the parasite populations resident in *inf+/+* cardia had  
169 translocated from ES to the lumen, while parasites in *inf+/-* cardia failed to bypass the PM  
170 barrier. These data suggest that the cardia physiological environment may influence the parasite  
171 infection phenotype and transmission potential.

172  
173 **PM is compromised in permissive (*inf+/+*) cardia but not in non-permissive (*inf+/-*) cardia**  
174 For successful transmission, trypanosomes that reside in the ES of the midgut must traverse the  
175 PM barrier a second time in order to reenter into the gut lumen, move forward through the foregut  
176 and mouthparts and colonize the SGs. This process is thought to occur in the cardia [6, 19]  
177 because newly synthesized PM in this niche likely provides a less robust barrier. We investigated  
178 whether the functional integrity of the PM in the two different infection states varied in the cardia

179 organ. We mined the non-inf cardia transcriptome dataset (S1 Dataset) and identified 14  
180 transcripts associated with PM structure and function [6, 9, 23], which cumulatively accounted  
181 for 35.7% of the total number of reads based on CPM value (Fig 3A). The same set of genes  
182 represented 26.5% and 34.5% of the inf+/+ and inf+/- transcriptome data sets, respectively (Fig  
183 3A). Thus, PM-associated transcripts are less abundant in the inf+/+ cardia relative to inf+/- and  
184 control cardia. We next evaluated the expression profile of the PM-associated transcripts and  
185 identified those that are differentially expressed (DE) with a fold-change of  $\geq 1.5$  in at least one  
186 infection state compared to the control (non-inf) (Fig 3B). We observed a significant reduction in  
187 cardia-specific transcripts for the major PM-associated Peritrophins (*pro2*, *pro3*) in the cardia  
188 inf+/+, but not the cardia inf+/- dataset. Peritrophins are structural glycoproteins that bind to  
189 chitin fibers that make up the PM and influence the elasticity and porosity of the barrier [21].  
190 Interestingly, the expression of *chitinase* was induced in both inf+/- and inf+/+ datasets. Because  
191 Chitinase activity can degrade the chitin backbone of the PM, increased levels of its expression  
192 would enhance the ability of the parasites to bypass this barrier. Overall, the inf+/+ cardia  
193 expression profile we observed here is similar to the profile noted in the cardia 72 hours post BSF  
194 parasite acquisition early in the infection process [9]. Results from that study demonstrated that  
195 reduced expression of genes that encode prominent PM associated proteins compromised PM  
196 integrity, thus increasing the midgut parasite infection prevalence [9]. Loss of PM integrity in the  
197 inf+/+ state could similarly enhance the ability of parasites to traverse the PM to re-enter the gut  
198 lumen and invade the SGs.

199

#### 200 **Reduction of PM integrity increases the prevalence of SG infections (inf+/+)**

201 We hypothesized that PM integrity is a prominent factor in the ability of trypanosomes to traverse  
202 the barrier in the cardia and continue their migration to the SGs. We addressed this hypothesis by  
203 experimentally disrupting the structural integrity of the PM in flies that harbored established gut  
204 parasite infections. We modified a dsRNA feeding procedure that targets tsetse *chitin synthase*  
205 (dsRNA-*cs*), which has been shown to effectively inhibit the production of a structurally robust  
206 PM [7]. We challenged flies with BSF trypanosomes as teneral adults and administered on day 6,  
207 8 and 10 post parasite acquisition blood meals containing dsRNA-*cs*. This is the time interval  
208 when we expect the parasites colonizing the ectoperitrophic space of the midgut to bypass the PM  
209 barrier in the cardia [19, 24, 25]. Control groups similarly received dsRNA targeting green

210 fluorescent protein (dsRNA-*gfp*). The decreased expression of *chitin synthase* in the  
211 experimental dsRNA-*cs* group relative to the control dsRNA-*gfp* group was confirmed (S4 Fig).  
212 Twenty days post dsRNA treatment, midguts and SGs were microscopically dissected and the SG  
213 infection status scored. We detected SG infections in 68% of dsRNA-*cs* treatment group  
214 compared to 47% in dsRNA-*gfp* control group (Fig 3C). Thus, the PM compromised group of  
215 flies showed a significant increase in *inf*<sup>+/+</sup> phenotype relative to the control group (GLM, Wald-  
216 test,  $p=0.0154$ ). These findings suggest that disruption of the PM later in the infection process  
217 increases the proportion of gut infected flies that give rise to mature SG infections (*inf*<sup>+/+</sup>). Thus,  
218 tsetse's PM acts as a barrier for parasite translocation from the ES to the lumen of the midgut, an  
219 essential step for successful SG colonization.

220

### 221 **Permissive (*inf*<sup>+/+</sup>) cardia extracts compromise PM integrity**

222 We sought to determine if components of *inf*<sup>+/+</sup> parasites infecting the cardia could manipulate  
223 cardia physiology to bypass the PM using a modified version of a survival assay that was  
224 successfully used to evaluate PM structural integrity [7, 9, 26]. In this assay, tsetse with an intact  
225 PM fail to immunologically detect the presence of the entomopathogenic *Serratia marcescens* in  
226 the gut lumen. The bacteria thus proliferate uncontrolled in this environment, translocate into the  
227 hemocoel and kill the fly [7]. Conversely, when PM structure is compromised, the fly's immune  
228 system can detect the presence of *Serratia* early during the infection process and express robust  
229 antimicrobial immunity that limits pathogen replication and increases host survival [7]. We  
230 provided mature adults blood meals supplemented with both entomopathogenic *Serratia* and  
231 *inf*<sup>+/+</sup> cardia extracts, while two age-matched control groups received either both *Serratia* and  
232 cardia extracts prepared from flies that had cleared their midgut infections (designated *rec*<sup>-/-</sup> for  
233 "recovered") or only *Serratia* (control). We found that survival of flies that received *inf*<sup>+/+</sup>  
234 extracts was significantly higher than either of the two control groups (Fig 3D). These findings  
235 suggest that cardia *inf*<sup>+/+</sup> extracts contain molecule(s) that negatively influence tsetse's PM  
236 integrity, thereby enabling these flies to more rapidly detect *Serratia* and express heightened  
237 immune responses to overcome this pathogen.

238 Our transcriptional investigation indicated that *inf*<sup>+/+</sup> parasites compromise PM  
239 associated gene expression while *inf*<sup>+/-</sup> parasites did not (Fig 3B). We also found that the density  
240 of the parasites colonizing the *inf*<sup>+/-</sup> cardia was significantly less than that found in the *inf*<sup>+/+</sup>



241 cardia (Fig 2). We applied the same survival assay using inf+/- cardia extracts containing an  
242 equivalent quantity of parasites as that tested in the cardia inf+/+ described above. We observed  
243 decreased fly survival when supplemented with the cardia+/- extracts, similar to the two control  
244 groups we had used before (Fig 3D). Collectively, these findings confirm that the parasites in  
245 cardia inf+/- differ in their ability to interfere with the PM integrity when compared with those in  
246 the cardia inf+/+ state. This suggests that parasites in inf+/+ cardia display a different molecular  
247 dialogue with tsetse vector tissues.

248 To understand the cardia-trypanosome interactions, we investigated the parasite  
249 populations in the inf+/+ state by EM analysis. We observed that trypanosomes accumulate in the  
250 region between the foregut and the midgut parts of the cardia where PM is synthesized (Fig 3E;  
251 S5 Fig). Our EM observations also showed that parasites aggregate in compact masses in-  
252 between the layers of the PM (Fig 3E; S5 Fig), similar to previously reported "cyst-like" bodies  
253 [24]. At the site of some of these aggregates, the luminal layer of the PM appeared disrupted,  
254 likely enabling the parasites to escape the barrier. The aggregations we detected in cardia inf+/+  
255 could represent a social behavior that influences cardia-trypanosome interactions and thus  
256 parasite transmission success. *In vitro* studies have observed one social behavior, called SoMo for  
257 social motility [27], where early-stage PCF parasites (similar to the forms that colonize the fly  
258 midgut) cluster and migrate together on semi-agar plates [28]. In the tsetse vector, phases where  
259 trypanosomes group in clusters and move in synchrony have been observed during the infection  
260 process independent of the developmental stage of the parasite [25]. In addition, these  
261 experiments also co-localize parasites in the cardia near the cells that produce the PM, similar to  
262 our EM observations.

### 263 264 **The cardia from non-permissive infections (inf+/-) is dysfunctional at the cellular level**

265 To obtain a global snapshot of cardia functions that could influence parasite infection outcomes,  
266 the DE cardia transcripts between control (non-inf) and either cardia inf+/- or cardia inf+/+  
267 datasets were subjected to Gene Ontology (GO) analysis (using Blast2GO) (S2 Dataset). We  
268 noted 88 GO terms that were preferentially down-regulated in the inf+/- state, while only 15 GO  
269 terms were down-regulated in the inf+/+ state. The 88 GO terms detected in the inf+/- dataset  
270 included 5, 11 and 67 terms associated with mitochondria, muscles and energy metabolism,  
271 respectively.

272 To understand the physiological implications of the *inf*<sup>+/-</sup> infection phenotype in the  
273 cardia, we investigated the transcriptional responses of the organ as well as the ultrastructural  
274 integrity of its mitochondria and muscle tissue. Gene expression patterns indicate that  
275 mitochondrial functions are significantly down-regulated in the *inf*<sup>+/-</sup> cardia relative to the *inf*<sup>+/+</sup>  
276 state (Fig 4A). More specifically, these genes encode proteins associated with energy metabolism,  
277 including the cytochrome c complex, the NADH-ubiquinone oxidoreductase and the ATP-  
278 synthase that function at the organelle's inner membrane. Loss of mitochondrial integrity was  
279 further demonstrated by microscopic analysis of cardia muscle cells (Fig 4B-D) and fat-  
280 containing cells (Fig 4E-G). In the cardia *inf*<sup>+/-</sup> phenotype, EM observations showed  
281 mitochondrial degradation around myofibrils associated with muscle cells (Fig 4C), while few  
282 such patterns were noted in the control cardia (Fig 4B) and cardia *inf*<sup>+/+</sup> (Fig 4D). The  
283 mitochondria within the lipid containing cells of both *inf*<sup>+/-</sup> and *inf*<sup>+/+</sup> presented a disruption in  
284 the cristae organization, suggesting a disruption of the inner membrane (Fig 4F-G), in support of  
285 transcriptomic level findings (Fig 4A).

286 In addition to putative mitochondrial proteins, we found that the expression of genes  
287 encoding structural proteins responsible for muscle contraction, such as myosin and troponin, is  
288 also significantly reduced upon infection, particularly in the cardia *inf*<sup>+/-</sup> state (Fig 5A). Electron  
289 microscopy analysis also revealed a disorganization of the Z band of sarcomeres in muscle tissue  
290 surrounding the midgut epithelia in *inf*<sup>+/-</sup> cardia, but not in the control and *inf*<sup>+/+</sup> cardia (Fig 5B-  
291 D). Extensive loss of muscle integrity was noted along the midgut epithelia in the *inf*<sup>+/-</sup> state. In  
292 addition, dilatation of the sarcoplasmic reticulum, muscle mitochondria swelling and vacuolation  
293 were observed, suggesting compromised muscle functions associated with this infection  
294 phenotype (S6 Fig). The detrimental effects of trypanosome infection on cardia structure and  
295 function are more apparent in the *inf*<sup>+/-</sup> compared to *inf*<sup>+/+</sup> state, despite the higher number of  
296 parasites present during the latter phenotype (Fig 3D).

297

### 298 **Oxidative stress restricts parasite infections in cardia *inf*<sup>+/-</sup>**

299 Mitochondria produce reactive oxygen intermediates (ROIs) [29], which in excess can damage  
300 the organelle and surrounding cellular structures [30, 31]. The structural damage we observed in  
301 mitochondria, muscle tissue and fat cells of *inf*<sup>+/-</sup> cardia is symptomatic of oxidative stress [32].  
302 Additionally, our EM observations demonstrate that parasites in *inf*<sup>+/-</sup> cardia exhibit cell-death

303 (Fig 6A-B), while parasites in inf<sup>+/+</sup> cardia appear structurally intact (Fig 3E-F). Because ROIs  
304 modulates trypanosome infection outcomes in tsetse [15, 33], we hypothesized that ROIs may be  
305 responsible for controlling trypanosomes in inf <sup>+/-</sup> cardia and for producing an oxidative  
306 environment that concurrently results in tissue damage. We observed a significant increase of  
307 peroxide concentrations in both inf<sup>+/-</sup> (406nM; TukeyHSD posthoc test,  $p < 0.0001$ ) and inf<sup>+/+</sup>  
308 (167nM; TukeyHSD posthoc test,  $p = 0.0008$ ) cardia relative to the control cardia (19 nM), with  
309 peroxide levels significantly higher in the inf<sup>+/-</sup> state (TukeyHSD posthoc test,  $p < 0.0001$ ) (Fig  
310 6C). When we experimentally decreased oxidative stress levels in infected flies by supplementing  
311 their blood meal with the anti-oxidant cysteine (10 $\mu$ M) (Fig 6D), 85% of midgut infected flies  
312 developed SG infections, while only 45% of midgut infected flies had SG infections in the  
313 absence of the antioxidant (GLM, Wald-test  $p < 0.001$ ). Our results indicate that the significantly  
314 higher levels of ROIs produced in the inf<sup>+/-</sup> cardia may restrict parasite infections at this crucial  
315 junction, while lower levels of ROIs in the inf<sup>+/+</sup> cardia may regulate the parasite density without  
316 impeding infection maintenance.

317 Homeostasis of redox balance is one of the most critical factors affecting host survival  
318 during continuous host-microbe interaction in the gastrointestinal tract [34]. In the mosquito  
319 *Anopheles gambiae*, increased mortality is observed when ROIs is produced in response to  
320 *Plasmodium berghei* infections [35]. A similar trade-off expressed in the inf<sup>+/-</sup> cardia may  
321 restrict parasite infections while causing collateral damage to essential physiologies. Conversely,  
322 strong anti-parasite responses that compromise essential physiologies are absent in infected cardia  
323 inf<sup>+/+</sup>, thus allowing the parasites to continue their journey to colonize the SG and successfully  
324 transmit to a new host. Additionally, flies with SG parasite infections also suffer from longer  
325 feeding times due to suppressed anti-coagulation activity in the salivary glands, which may once  
326 again help with parasite transmission [36].

327

## 328 **Conclusion**

329 Trypanosome transmission by tsetse reflects a tug-of-war that begins with parasite colonization of  
330 the midgut and ends when parasites are transmitted to the next vertebrate via saliva. During the  
331 initial stages of infection establishment, BSF parasite surface antigens, VSGs, that are shed into  
332 the gut lumen have been found to manipulate vector gene expression in the cardia. This  
333 interference results in a transiently compromise PM that enables the parasites to escape the blood

334 bolus and invade the ES stage of the midgut. While tsetse's immune responses eliminate parasites  
335 from the majority of flies, some trypanosomes persist and colonize the cardia of a small  
336 proportion of flies. We show here that translocation from the cardia's ES to the lumen, by passing  
337 through the PM, is an integral component of the trypanosome life-cycle in tsetse and that loss of  
338 PM integrity is an essential requirement for the success of this process (summarized in Fig 7).  
339 Trypanosomes may once again manipulate this process by influencing the expression of PM-  
340 associated genes in the cardia through molecular interference, similar to what occurs in the initial  
341 stages of infection establishment in the midgut [9]. It is also possible that trypanosome produced  
342 products may further act on the PM to reduce its integrity and efficacy as a barrier. Finally,  
343 parasite transmission could represent a trade-off where vector tolerance to the parasites  
344 minimizes self-inflicted collateral damage. Our work substantiates the central role that the PM  
345 plays in the parasite-vector interaction. It potentializes this membrane as a target for vector  
346 control strategies to enhance its barrier function to block parasite transmission.

## 347 **Methods**

### 348 **Ethical consideration**

349 This work was carried out in strict accordance with the recommendations in the Office of  
350 Laboratory Animal Welfare at the National Institutes of Health and the Yale University Institu-  
351 tional Animal Care and Use Committee. The experimental protocol was reviewed and approved  
352 by the Yale University Institutional Animal Care and Use Committee (Protocol 2014-07266  
353 renewed on May 2017).

354

### 355 **Biological material**

356 *Glossina morsitans morsitans* were maintained in Yale's insectary at 24°C with 50-55% relative  
357 humidity. All flies received defibrinated bovine blood (Hemostat Laboratories) every 48 hours  
358 through an artificial membrane feeding system. Only female flies were used in this study.

359 Bloodstream form *Trypanosoma brucei brucei* (RUMP 503) were expanded in rats.

360 Flies were infected by supplementing the first blood meal of newly eclosed flies (teneral) with  
361  $5 \times 10^6$  parasites /ml. Where mentioned, cysteine (10 $\mu$ M) was added to the infective blood meal to  
362 increase the infection prevalence [15].

363 For survival assays, *Serratia marcescens* strain Db11 was grown overnight in LB medium. Prior  
364 to supplementation with *Serratia*, the blood was inactivated by heat treatment at 56°C for 1 hour  
365 as described in [7].

366

### 367 **mRNA Library Constructions and Sequencing**

368 At day 40 post parasite challenge, all flies were dissected 48 hours after their last blood meal, and  
369 midgut and salivary glands (SG) were microscopically examined for infection status. Flies were  
370 classified as inf+/+ when infection was positive in both the midgut and the SG, as inf+/- when  
371 infection was positive in the midgut but negative in the SG. Cardia from inf+/+ and inf+/- flies  
372 were dissected and immediately placed in ice-cold TRIzol (Invitrogen). For each infected group,  
373 inf+/+ and inf+/-, 10 cardia were pooled into one biological replicate and three biological  
374 replicates were obtained and stored at -80°C prior to RNA extraction. Similarly, three biological  
375 replicates containing 10 cardia from age-matched flies that had only received normal blood meals  
376 (non-inf) were prepared. Total RNA was extracted from the nine biological replicates using the  
377 Direct-zol RNA Minipreps kit (Zymo Research) following the manufacturer instructions, then

378 subjected to DNase treatment using the Ambion TURBO DNA-free kit AM1907 (Thermo Fisher  
379 Scientific). RNA quality was analyzed using the Agilent 2100 Bioanalyzer RNA Nano chip.  
380 mRNA libraries were prepared using the NEBNext Ultra RNA Library Prep Kit for Illumina  
381 (New England BioLabs) following the manufacturer recommendations. The nine libraries were  
382 sequenced (single-end) at the Yale Center for Genome Analysis (YCGA) using the HiSeq2500  
383 system (Illumina). Read files have been deposited in the NCBI BioProject database (ID#  
384 PRJNA358388).

385

### 386 **RNA-seq data processing**

387 Using CLC Genomics Workbench 8 (Qiagen), transcriptome reads were first trimmed and filtered  
388 to remove ambiguous nucleotides and low-quality sequences. The remaining reads were mapped  
389 to *Glossina morsitans morsitans* reference transcriptome GmorY1.5 (VectorBase.org). Reads  
390 aligning uniquely to *Glossina* transcripts were used to calculate differential gene expression using  
391 EdgeR package in R software [37].

392 Significance was determined using EdgeR exact test for the negative binomial distribution,  
393 corrected with a False Discovery Rate (FDR) at  $P < 0.05$ .

394 Identified genes were functionally annotated by BlastX, with an E-value cut-off of  $1e^{-10}$  and bit  
395 score of 200, and peptide data available from *D. melanogaster* database (FlyBase.org). Blast2GO  
396 was utilized to identify specific gene ontology (GO) terms that were enriched between treatments  
397 based on a Fisher's Exact Test [38].

398

### 399 **Electron microscopy**

400 Cardia tissues from non-inf, inf+/-, inf+/+ 40 day-old flies were dissected in 4%  
401 paraformaldehyde (PFA) and placed in 2.5% glutaraldehyde and 2% PFA in 0.1M sodium  
402 cacodylate buffer pH7.4 for 1 hour. Tissues were processed at the Yale Center for Cellular and  
403 Molecular Imaging (CCMI). Tissues were fixed in 1% osmium tetroxide, rinsed in 0.1M sodium  
404 cacodylate buffer and blocked and stained in 2% aqueous uranyl acetate for 1 hour. Subsequently,  
405 tissues were rinsed and dehydrated in a series in ethanol followed by embedment in resin  
406 infiltration Embed 812 (Electron Microscopy Sciences) and then stored overnight at 60°C.  
407 Hardened blocks were cut using a Leica UltraCut UC7 60nm. The resulting sections were  
408 collected on formvar/carbon coated grids and contrast-stained in 2% uranyl acetate and lead

409 citrate. Grids prepared from 3 different insects for each treatment were observed using a FEI  
410 Tecnai Biotwin transmission electron microscope at 80Kv. Images were taken using a Morada  
411 CCD camera piloted with the iTEM (Olympus) software.

412

### 413 **Quantification of trypanosomes**

414 At day 40 post parasite challenge, flies were dissected 72 hours after their last blood meal, and  
415 midgut and salivary glands (SG) were microscopically examined for infection status. Cardia were  
416 dissected, pooled by 5 in ice-cold TRIzol (Invitrogen) in function of their infection status (inf+/  
417 or inf+/-), and then flash-frozen in liquid nitrogen. RNA was extracted using the Direct-zol RNA  
418 MiniPrep (Zymo Research) following the manufacturer instructions, then subjected to DNase  
419 treatment using the Ambion TURBO DNA-free kit AM1907 (Thermo Fisher Scientific). 100ng  
420 of RNA was utilized to prepare cDNA using the iScript cDNA synthesis kit (Bio-Rad) following  
421 the manufacturer instructions. qPCR analysis was performed using SYBR Green supermix (Bio-  
422 Rad) and a Bio-Rad C1000 thermal cycler. Quantitative measurements were performed in  
423 duplicate for all samples. We used ATTCACGCTTTGGTTTGACC (forward) and  
424 GCATCCGCGTCATTCATAA (reverse) as primers to amplify trypanosome *gapdh*. We used  
425 CTGATTTTCGTTGGTGATACT (forward) and CCAAATTCGTTGTCGTACCA (reverse) as  
426 primers to amplify tsetse *gapdh*. Relative density of parasite was inferred by normalizing  
427 trypanosome *gapdh* expression by tsetse *gapdh* expression. Statistical comparison of relative  
428 densities was performed on Prism 7 (GraphPad software) using a Student t-test.  
429 Direct counting of parasites was operated by dissecting the cardia and the whole remaining  
430 midgut from flies prepared similarly than above. Individual tissues were homogenized in PSG  
431 buffer (8 replicates for each tissue). Homogenate was then fixed in an equal volume of 4% PFA  
432 for 30 min. The solution was then centrifuged 15 min at 1,000 rpm, the supernatant was discarded  
433 and the pellets containing the trypanosomes from cardia and midguts were suspended in 100µl  
434 and 2,500µl PSG buffer, respectively. Trypanosomes from the total solution were counted using a  
435 hemocytometer. Statistical comparison of numbers was performed on Prism 7 (GraphPad  
436 software) using a Mann-Whitney rank test.

437

### 438 **Midgut-associated procyclic trypanosome re-infection.**

439 At day 40 post parasite challenge, flies were dissected 72 hours after their last blood meal, and  
440 midgut and salivary glands (SG) were microscopically examined for infection status. Around 40  
441 inf+/+ and inf+/- were independently pooled together, and then roughly homogenize in 500µl of  
442 PSG buffer (PBS+2% glucose). Each homogenate was centrifuged 10 min at 500 rpm to  
443 precipitate midgut debris, and then each supernatant containing parasites was transferred to a new  
444 tube to be centrifuged 15 min at 1,000 rpm to precipitate the parasites. Supernatants were then  
445 discarded and each pellet containing midgut procyclic trypanosomes either from inf+/+ or inf+/-  
446 flies was suspended in 500µl PSG. Parasites were counted using a hemocytometer.  
447 Newly emerged adult females were provided a blood diet including 10 µM Cysteine and  
448 supplemented with  $5 \times 10^6$  of procyclic trypanosomes from either inf+/+ or inf+/- flies prepared as  
449 described above. All flies were subsequently maintained on normal blood thereafter every 48 h.  
450 Four independent experiments were done for each type of trypanosomes. Midgut and salivary  
451 gland infections in each group were scored microscopically two weeks later. Precise sample sizes  
452 and count data are indicated in S3 Dataset.  
453 Statistical analysis was carried out using the R software for macOS (version 3.3.2). A generalized  
454 linear model (GLM) was generated using binomial distribution with a logit transformation of the  
455 data. The binary infection status (inf+/+ or inf+/-) was analyzed as a function of the origin of the  
456 procyclic trypanosomes (inf+/+ or inf+/-) and the experiment it belongs to. The best statistical  
457 model was searched using a backward stepwise procedure from full additive model (*i.e.* parasite  
458 origin+experiment#) testing the main effect of each categorical explanatory factor. Using the  
459 retained model, we performed a Wald test on the individual regression parameters to test their  
460 statistical difference. Precise statistical results are indicated in S3 Dataset.

461

#### 462 **RNAi-mediated knockdown of PM-associated gene expression**

463 *Green fluorescent protein (gfp)* and *chitin synthase (cs)* gene specific dsRNAs were prepared as  
464 described in [7]. Newly emerged adult females were provided with a trypanosome supplemented  
465 blood diet that also included 10 µM Cysteine. All flies were subsequently maintained on normal  
466 blood thereafter every 48 h. After 6 days (at the 3rd blood meal), flies were divided into two  
467 treatment groups: first group received dsRNA-*cs* and the second group control dsRNA-*gfp*. The  
468 dsRNAs were administered to each group in 3 consecutive blood meals containing 3mg  
469 dsRNA/20µl blood (the approximate volume a tsetse fly imbibes each time it feeds). Four



470 independent experiments using the same pool of dsRNA were generated for each treatment.  
471 Midgut and salivary gland infections in each group were scored microscopically three weeks  
472 later. Precise sample sizes and count data are indicated in S3 Dataset. Statistical analysis on the  
473 infection outcomes following the antioxidant feeding was carried out using the R software for  
474 macOS (version 3.3.2). A generalized linear model (GLM) was generated using binomial  
475 distribution with a logit transformation of the data. The binary infection status (inf+/+ or inf+/-)  
476 was analyzed as a function of the dsRNA treatment (dsRNA-*gfp* or dsRNA-*cs*) and the  
477 experiment it belongs to. The best statistical model was searched using a backward stepwise  
478 procedure from full additive model (*i.e.* dsRNA treatment+experiment#) testing the main effect  
479 of each categorical explanatory factors. Using the retained model, we performed a Wald test on  
480 the individual regression parameters to test their statistical difference. Precise statistical results  
481 are indicated in S3 Dataset.

482 Quantitative real-time PCR (qRT-PCR) was used to validate the effectiveness of our RNAi  
483 procedure as described in [7]. For each treatment of each experiment, we dissected the cardia of  
484 five randomly selected flies 72h after their third dsRNA-supplemented blood meal. The five  
485 dissected cardia were pooled together and their RNA was extracted. 100ng RNA was used to  
486 generate cDNA. RNA extractions from experiment #3 failed, but as the same dsRNA pools were  
487 used for all experiments and considering the consistency of the knockdown we observed, we  
488 decided to maintain experiment #3 in our counting results.

489  
490 ***Serratia* infection assay to assess peritrophic matrix integrity**  
491 To assess the PM integrity, we applied a host survival assay following *per os* treatment of each  
492 group with *Serratia marcescens* as described in [7, 9]. We provided to three groups of 8 day-old  
493 flies (in their 4<sup>th</sup> blood meal) either cardia extracts obtained from challenged flies that cleared the  
494 trypanosomes and are subsequently recovered from initial infection (rec-/-), or a cardia extract  
495 from inf+/- flies, or a cardia extract from inf+/+ flies. We included a fourth group of 8-day old  
496 flies that received an untreated blood meal.

497 Cardia extract was obtained by dissecting, in PBS, the cardia from 40 days-old infected as  
498 described above. Approximately fifty cardia from either rec-/-, inf+/- or inf+/+ flies were pooled  
499 together, and then gently homogenized. Parasites were counted from the homogenates of inf+/-  
500 and inf+/+ using a hemocytometer. The three cardia homogenates were then heated at 100°C for

501 10 minutes. *inf+/-* and *inf+/+* extracts were provided to reach a concentration of  $5 \times 10^5$  parasites  
502 per ml of blood. As *inf+/-* cardia contain fewer parasites than *inf+/+* cardia, the volume of the  
503 *inf+/+* extract provided was adjusted by dilution in PSG buffer to be equal to *inf+/-* volume. Rec-  
504 *-* extract was provided at an equal volume than infected extracts to ensure the presence of a  
505 similar quantity of extract molecules coming from the cardia in these groups. 48 hours after the  
506 flies received blood meal supplemented with the different extracts, all flies were provided a blood  
507 meal supplemented with 1,000 CFU/ml of *S. marcescens* strain Db11. Thereafter, flies were  
508 maintained on normal blood every other day, while their mortality was recorded every day for 30  
509 days. Precise counting data are indicated in S3 Dataset.

510 Statistical analysis was carried out using the R software for macOS (version 3.3.2). We used an  
511 accelerated failure time model (Weibull distribution) where survival was analyzed as a function  
512 of the extract received (`survreg()` function of "survival" package). Pairwise tests were generated  
513 using Tukey contrasts on the survival model (`glht()` function of "multcomp" package). Precise  
514 statistical results are indicated in S3 Dataset.

515  
516 **Antioxidant feeding**  
517 Newly emerged adult females were provided with a trypanosome-supplemented blood diet that  
518 also included 10  $\mu$ M Cysteine. All flies were subsequently maintained on normal blood thereafter  
519 every 48 h. After 10 days (at the 5th blood meal), flies were divided into two treatment groups:  
520 first group received the anti-oxidant Cysteine (10 $\mu$ M) and the second group was fed normally as  
521 a control. Cysteine was administered each blood meal until dissection. Four independent  
522 experiments were done for each treatment. Midgut and salivary gland infections in each group  
523 were scored microscopically three weeks later. Precise sample sizes and count data are indicated  
524 in S3 Dataset.

525 Statistical analysis was carried out using the R software for macOS (version 3.3.2). A generalized  
526 linear model (GLM) was generated using binomial distribution with a logit transformation of the  
527 data. The binary infection status (*inf+/+* or *inf+/-*) was analyzed as a function of the treatment  
528 (control or cysteine) and the experiment it belongs to. The best statistical model was searched  
529 using a backward stepwise procedure from full additive model (*i.e.* antioxidant  
530 treatment+experiment#) testing the main effect of each categorical explanatory factors. Using the

531 retained model, we performed a Wald test on the individual regression parameters to test their  
532 statistical difference. Precise statistical results are indicated in S3 Dataset.

533

#### 534 **Quantification of reactive oxygen species (ROS) in cardia tissues**

535 ROS were quantified using the Amplex Red Hydrogen Peroxide/Peroxidase Assay Kit  
536 (ThermoFisher Scientific), following the manufacturer recommendations. 40 days post parasite  
537 challenge, flies were dissected 72 hours after their last blood meal, and midgut and salivary  
538 glands (SG) were microscopically examined for infection status. For each infection phenotype  
539 (i.e. *inf+/+* or *inf+/-*), 3 replicates containing each 10 cardia tissues pooled and homogenized in  
540 80 $\mu$ l of ice-cold Amplex Red Kit 1X Reaction Buffer were generated. 3 replicates of age-  
541 matched non-infected cardia tissues were conceived in the same manner. 50 $\mu$ l of assay reaction  
542 mix was added to 50 $\mu$ l of the supernatant of each samples, and then incubated 60 minutes at RT.  
543 Fluorescence units were determined using a BioTek Synergy HT plate reader (530nm excitation;  
544 590nm emission). Peroxide concentrations were determined using the BioTek Gen5 software  
545 calculation inferred from a standard curve (precise results are indicated in S3 Dataset). Statistical  
546 analysis was performed on Prism 7 (GraphPad software) using a one-way ANOVA where ROS  
547 concentration was analyzed as a function of the infection status. Pairwise comparisons were  
548 carried out using a TukeyHSD posthoc test.

549 **Acknowledgements**

550 We thank Dr. Ying Yang for technical assistance with the tsetse fly colony, Drs. Nikolay Kolev  
551 and Chris Tschudi for their advice with data interpretation, Morven Graham for her assistance  
552 with electron microscopy data interpretation, and Drs. Maria Onyango, Mehmet Karakus and  
553 Florent Masson for their critical comments on the manuscript.

554

## 555 References

- 556 1. Simarro PP, Cecchi G, Franco JR, Paone M, Diarra A, Priotto G, et al. Monitoring the  
557 progress towards the elimination of gambiense human African trypanosomiasis. *PLOS Negl Trop*  
558 *Dis.* 2015;9(6):e0003785. Epub 2015/06/10. doi: 10.1371/journal.pntd.0003785. PubMed PMID:  
559 26056823; PubMed Central PMCID: PMC4461311.
- 560 2. Simarro PP, Cecchi G, Franco JR, Paone M, Diarra A, Ruiz-Postigo JA, et al. Estimating and  
561 mapping the population at risk of sleeping sickness. *PLOS Negl Trop Dis.* 2012;6(10):e1859. Epub  
562 2012/11/13. doi: 10.1371/journal.pntd.0001859. PubMed PMID: 23145192; PubMed Central  
563 PMCID: PMC493382.
- 564 3. Courtin F, Camara M, Rayaisse JB, Kagbadouno M, Dama E, Camara O, et al. Reducing  
565 human-tsetse contact significantly enhances the efficacy of sleeping sickness active screening  
566 campaigns: a promising result in the context of elimination. *PLOS Negl Trop Dis.*  
567 2015;9(8):e0003727. Epub 2015/08/13. doi: 10.1371/journal.pntd.0003727. PubMed PMID:  
568 26267667; PubMed Central PMCID: PMC4534387.
- 569 4. Davis S, Aksoy S, Galvani A. A global sensitivity analysis for African sleeping sickness.  
570 *Parasitology.* 2011;138(4):516-26. Epub 2010/11/17. doi: 10.1017/S0031182010001496.  
571 PubMed PMID: 21078220; PubMed Central PMCID: PMC3282146.
- 572 5. Hegedus D, Erlandson M, Gillott C, Toprak U. New insights into peritrophic matrix  
573 synthesis, architecture, and function. *Annu Rev Entomol.* 2009;54:285-302. Epub 2008/12/11.  
574 doi: 10.1146/annurev.ento.54.110807.090559. PubMed PMID: 19067633.
- 575 6. Rose C, Belmonte R, Armstrong SD, Molyneux G, Haines LR, Lehane MJ, et al. An  
576 investigation into the protein composition of the teneral *Glossina morsitans morsitans*  
577 peritrophic matrix. *PLOS Negl Trop Dis.* 2014;8(4):e2691. Epub 2014/04/26. doi:  
578 10.1371/journal.pntd.0002691. PubMed PMID: 24763256; PubMed Central PMCID:  
579 PMC3998921.
- 580 7. Weiss BL, Savage AF, Griffith BC, Wu Y, Aksoy S. The peritrophic matrix mediates  
581 differential infection outcomes in the tsetse fly gut following challenge with commensal,  
582 pathogenic, and parasitic microbes. *J Immunol.* 2014;193(2):773-82. Epub 2014/06/11. doi:  
583 10.4049/jimmunol.1400163. PubMed PMID: 24913976; PubMed Central PMCID:  
584 PMC4107339.
- 585 8. Rodgers FH, Gendrin M, Wyer CAS, Christophides GK. Microbiota-induced peritrophic  
586 matrix regulates midgut homeostasis and prevents systemic infection of malaria vector  
587 mosquitoes. *PLOS Pathog.* 2017;13(5):e1006391. Epub 2017/05/26. doi:  
588 10.1371/journal.ppat.1006391. PubMed PMID: 28545061; PubMed Central PMCID:  
589 PMC5448818.
- 590 9. Aksoy E, Vigneron A, Bing X, Zhao X, O'Neill M, Wu YN, et al. Mammalian African  
591 trypanosome VSG coat enhances tsetse's vector competence. *Proc Natl Acad Sci U S A.*  
592 2016;113(25):6961-6. Epub 2016/05/18. doi: 10.1073/pnas.1600304113. PubMed PMID:  
593 27185908; PubMed Central PMCID: PMC4922192.
- 594 10. Coutinho-Abreu IV, Sharma NK, Robles-Murguía M, Ramalho-Ortigao M. Characterization  
595 of *Phlebotomus papatasi* peritrophins, and the role of PpPer1 in *Leishmania* major survival in its  
596 natural vector. *PLOS Negl Trop Dis.* 2013;7(3):e2132. Epub 2013/03/22. doi:

- 597 10.1371/journal.pntd.0002132. PubMed PMID: 23516661; PubMed Central PMCID:  
598 PMCPMC3597473.
- 599 11. Narasimhan S, Rajeevan N, Liu L, Zhao YO, Heisig J, Pan J, et al. Gut microbiota of the tick  
600 vector *Ixodes scapularis* modulate colonization of the Lyme disease spirochete. *Cell Host*  
601 *Microbe*. 2014;15(1):58-71. Epub 2014/01/21. doi: 10.1016/j.chom.2013.12.001. PubMed PMID:  
602 24439898; PubMed Central PMCID: PMCPMC3905459.
- 603 12. Turner CM, Barry JD, Vickerman K. Loss of variable antigen during transformation of  
604 *Trypanosoma brucei rhodesiense* from bloodstream to procyclic forms in the tsetse fly. *Parasitol*  
605 *Res*. 1988;74(6):507-11. Epub 1988/01/01. PubMed PMID: 3194363.
- 606 13. Hao Z, Kasumba I, Lehane MJ, Gibson WC, Kwon J, Aksoy S. Tsetse immune responses  
607 and trypanosome transmission: implications for the development of tsetse-based strategies to  
608 reduce trypanosomiasis. *Proc Natl Acad Sci U S A*. 2001;98(22):12648-53. Epub 2001/10/11. doi:  
609 10.1073/pnas.221363798. PubMed PMID: 11592981; PubMed Central PMCID: PMCPMC60108.
- 610 14. Hu Y, Aksoy S. An antimicrobial peptide with trypanocidal activity characterized from  
611 *Glossina morsitans morsitans*. *Insect Biochem Mol Biol*. 2005;35(2):105-15. Epub 2005/02/01.  
612 doi: 10.1016/j.ibmb.2004.10.007. PubMed PMID: 15681221.
- 613 15. MacLeod ET, Maudlin I, Darby AC, Welburn SC. Antioxidants promote establishment of  
614 trypanosome infections in tsetse. *Parasitology*. 2007;134(Pt 6):827-31. Epub 2007/02/20. doi:  
615 10.1017/S0031182007002247. PubMed PMID: 17306056.
- 616 16. Wang J, Aksoy S. PGRP-LB is a maternally transmitted immune milk protein that  
617 influences symbiosis and parasitism in tsetse's offspring. *Proc Natl Acad Sci U S A*.  
618 2012;109(26):10552-7. Epub 2012/06/13. doi: 10.1073/pnas.1116431109. PubMed PMID:  
619 22689989; PubMed Central PMCID: PMCPMC3387098.
- 620 17. Haines LR, Lehane SM, Pearson TW, Lehane MJ. Tsetse EP protein protects the fly midgut  
621 from trypanosome establishment. *PLOS Pathog*. 2010;6(3):e1000793. Epub 2010/03/12. doi:  
622 10.1371/journal.ppat.1000793. PubMed PMID: 20221444; PubMed Central PMCID:  
623 PMCPMC2832768.
- 624 18. Sharma R, Peacock L, Gluenz E, Gull K, Gibson W, Carrington M. Asymmetric cell division  
625 as a route to reduction in cell length and change in cell morphology in trypanosomes. *Protist*.  
626 2008;159(1):137-51. Epub 2007/10/13. doi: 10.1016/j.protis.2007.07.004. PubMed PMID:  
627 17931969.
- 628 19. Van Den Abbeele J, Claes Y, van Bockstaele D, Le Ray D, Coosemans M. *Trypanosoma*  
629 *brucei* spp. development in the tsetse fly: characterization of the post-mesocyclic stages in the  
630 foregut and proboscis. *Parasitology*. 1999;118 ( Pt 5):469-78. Epub 1999/06/11. PubMed PMID:  
631 10363280.
- 632 20. Buxton P. The natural history of tsetse flies. London: H. K. Lewis and Co. Ltd.; 1955.
- 633 21. Lehane MJ. Peritrophic matrix structure and function. *Annu Rev Entomol*. 1997;42:525-  
634 50. Epub 1997/01/01. doi: 10.1146/annurev.ento.42.1.525. PubMed PMID: 15012322.
- 635 22. Wigglesworth VB. Digestion in the tsetse-fly: a study of structure and function.  
636 *Parasitology*. 1929;21(3):288-321.
- 637 23. Hao Z, Aksoy S. Proventriculus-specific cDNAs characterized from the tsetse, *Glossina*  
638 *morsitans morsitans*. *Insect Biochem Mol Biol*. 2002;32(12):1663-71. Epub 2002/11/14. PubMed  
639 PMID: 12429118.

- 640 24. Gibson W, Bailey M. The development of *Trypanosoma brucei* within the tsetse fly  
641 midgut observed using green fluorescent trypanosomes. *Kinetoplastid Biol Dis.* 2003;2(1):1.  
642 Epub 2003/05/29. PubMed PMID: 12769824; PubMed Central PMCID: PMCPMC156611.
- 643 25. Schuster S, Krüger T, Subota I, Thusek S, Rotureau B, Beilhack A, et al. Developmental  
644 adaptations of trypanosome motility to the tsetse fly host environments unravel a multifaceted  
645 *in vivo* microswimmer system. *eLife.* 2017;6:e27656. doi: 10.7554/eLife.27656.
- 646 26. Kuraishi T, Binggeli O, Opota O, Buchon N, Lemaitre B. Genetic evidence for a protective  
647 role of the peritrophic matrix against intestinal bacterial infection in *Drosophila melanogaster*.  
648 *Proc Natl Acad Sci U S A.* 2011;108(38):15966-71. Epub 2011/09/08. doi:  
649 10.1073/pnas.1105994108. PubMed PMID: 21896728; PubMed Central PMCID:  
650 PMCPMC3179054.
- 651 27. Oberholzer M, Lopez MA, McLelland BT, Hill KL. Social motility in African trypanosomes.  
652 *PLOS Pathog.* 2010;6(1):e1000739. Epub 2010/02/04. doi: 10.1371/journal.ppat.1000739.  
653 PubMed PMID: 20126443; PubMed Central PMCID: PMCPMC2813273.
- 654 28. Imhof S, Knusel S, Gunasekera K, Vu XL, Roditi I. Social motility of African trypanosomes  
655 is a property of a distinct life-cycle stage that occurs early in tsetse fly transmission. *PLOS*  
656 *Pathog.* 2014;10(10):e1004493. Epub 2014/10/31. doi: 10.1371/journal.ppat.1004493. PubMed  
657 PMID: 25357194; PubMed Central PMCID: PMCPMC4214818.
- 658 29. Murphy MP. How mitochondria produce reactive oxygen species. *Biochem J.*  
659 2009;417(1):1-13. Epub 2008/12/09. doi: 10.1042/BJ20081386. PubMed PMID: 19061483;  
660 PubMed Central PMCID: PMCPMC2605959.
- 661 30. Kowaltowski AJ, Vercesi AE. Mitochondrial damage induced by conditions of oxidative  
662 stress. *Free Radic Biol Med.* 1999;26(3-4):463-71. Epub 1999/01/23. PubMed PMID: 9895239.
- 663 31. Wang Y, Nartiss Y, Steipe B, McQuibban GA, Kim PK. ROS-induced mitochondrial  
664 depolarization initiates PARK2/PARKIN-dependent mitochondrial degradation by autophagy.  
665 *Autophagy.* 2012;8(10):1462-76. Epub 2012/08/15. doi: 10.4161/auto.21211. PubMed PMID:  
666 22889933.
- 667 32. Bravard A, Bonnard C, Durand A, Chauvin MA, Favier R, Vidal H, et al. Inhibition of  
668 xanthine oxidase reduces hyperglycemia-induced oxidative stress and improves mitochondrial  
669 alterations in skeletal muscle of diabetic mice. *Am J Physiol Endocrinol Metab.*  
670 2011;300(3):E581-91. Epub 2011/01/13. doi: 10.1152/ajpendo.00455.2010. PubMed PMID:  
671 21224483.
- 672 33. Ridgley EL, Xiong ZH, Ruben L. Reactive oxygen species activate a Ca<sup>2+</sup>-dependent cell  
673 death pathway in the unicellular organism *Trypanosoma brucei brucei*. *Biochem J.* 1999;340 ( Pt  
674 1):33-40. Epub 1999/05/07. PubMed PMID: 10229656; PubMed Central PMCID:  
675 PMCPMC1220219.
- 676 34. Ha EM, Oh CT, Ryu JH, Bae YS, Kang SW, Jang IH, et al. An antioxidant system required for  
677 host protection against gut infection in *Drosophila*. *Dev Cell.* 2005;8(1):125-32. Epub  
678 2004/12/29. doi: 10.1016/j.devcel.2004.11.007. PubMed PMID: 15621536.
- 679 35. Molina-Cruz A, DeJong RJ, Charles B, Gupta L, Kumar S, Jaramillo-Gutierrez G, et al.  
680 Reactive oxygen species modulate *Anopheles gambiae* immunity against bacteria and  
681 *Plasmodium*. *J Biol Chem.* 2008;283(6):3217-23. Epub 2007/12/11. doi:  
682 10.1074/jbc.M705873200. PubMed PMID: 18065421.

- 683 36. Van Den Abbeele J, Caljon G, De Ridder K, De Baetselier P, Coosemans M. *Trypanosoma*  
684 *brucei* modifies the tsetse salivary composition, altering the fly feeding behavior that favors  
685 parasite transmission. PLOS Pathog. 2010;6(6):e1000926. Epub 2010/06/10. doi:  
686 10.1371/journal.ppat.1000926. PubMed PMID: 20532213; PubMed Central PMCID:  
687 PMC2880569.
- 688 37. Robinson MD, McCarthy DJ, Smyth GK. edgeR: a Bioconductor package for differential  
689 expression analysis of digital gene expression data. Bioinformatics. 2010;26(1):139-40. Epub  
690 2009/11/17. doi: 10.1093/bioinformatics/btp616. PubMed PMID: 19910308; PubMed Central  
691 PMCID: PMC2796818.
- 692 38. Conesa A, Gotz S, Garcia-Gomez JM, Terol J, Talon M, Robles M. Blast2GO: a universal  
693 tool for annotation, visualization and analysis in functional genomics research. Bioinformatics.  
694 2005;21(18):3674-6. Epub 2005/08/06. doi: 10.1093/bioinformatics/bti610. PubMed PMID:  
695 16081474.  
696



## 697 **Figure captions**

### 698 **Fig 1. Dynamics of parasite infection in tsetse flies.**

699 (A) Cardia and SG organs were dissected from 40-day old female flies subjected to a single  
700 parasite infection as newly eclosed adults. Infection prevalence data for infected cardia (white  
701 circles) and infected salivary glands (grey circles) are shown for three independent replicate  
702 experiments. The black bars represent the mean of the three replicates. The total number of flies  
703 used for the 3 biological samples is:  $N_1=46$ ;  $N_2=71$ ;  $N_3=73$ . (B) Localization of trypanosomes in  
704 tsetse fly tissues. In the non-permissive flies (*inf+/-* state, shown in the upper scheme) only the  
705 midgut, including the cardia, is colonized by parasites, which reside in the ectoperitrophic space  
706 (purple). In the permissive flies (*inf+/+* state, shown the lower scheme), in addition to being  
707 located in the midgut, parasites colonize the SG (violet). (C) Percentage of permissive infections  
708 (*inf+/+*) following challenge at teneral stage with procyclic parasites obtained from either *inf+/-*  
709 or *inf+/+* midgut. A total of 4 experiments were performed for each treatment. A total number of  
710 64 infected flies were observed for each treatment. The black bar represents the mean of the 4  
711 experiments. SG infection is independent of the initial *inf+/-* or *inf+/+* status of the parasite used  
712 for fly infection (GLM,  $p=1$ , detailed model in S3 Dataset).

713

### 714 **Fig 2. Trypanosome infection establishment process**

715 (A) Percentage of RNAseq reads mapped to the parasite reference geneset from the three  
716 biological replicates of *inf+/-* cardia is depicted in red circles and *inf+/+* depicted in blue circles.  
717 A same number in the circle depict flies from the same sample. The total number of flies used for  
718 the 3 biological samples is:  $N_1=46$ ;  $N_2=71$ ;  $N_3=73$ . The black bars indicate the mean of the 3  
719 replicates. (B) Abundance of trypanosome *gapdh* relative to tsetse *gapdh* determined from *inf+/-*  
720 cardia (shown by red circles) and *inf+/+* cardia (shown by blue circles). The black bars indicate  
721 the mean of the replicates. The increase in relative abundance indicates an increase in parasite  
722 numbers in the *inf+/+* cardia (Student t-test,  $p= 0.0028$ ). (C) Schematic representation of the  
723 cardia organ based on microscopic observations. The cardia is composed of cells originating from  
724 the foregut (light orange) and midgut (light blue) at the junction of the fore- and mid-gut. The  
725 midgut cells form a glandular tissue that secretes the PM components are shown in green along  
726 with the foregut opposing cells. Sphincter muscles that form a ring above the glandular cells are  
727 indicated as well as the thin layer of muscle that surrounds large lipid-containing cells (shown in

728 yellow). **(D-E)** Electron microscopy observations of trypanosomes within cardia inf<sup>+/-</sup> (D) and  
729 cardia inf<sup>+/+</sup> (E).

730

731 **Fig 3. Parasite infection effects on PM synthesis in cardia inf<sup>+/+</sup> and inf<sup>+/-</sup>**

732 **(A)** Percentage of the total transcriptome expression represented by PM-associated transcripts.

733 **(B)** Differential expression of PM-associated transcripts in flies that present distinct infection  
734 phenotypes. Each dot represents the abundance of one transcript expressed as fold-change against  
735 the non-infected control. The expression values from infected <sup>+/+</sup> cardia are shown by blue  
736 circles and from infected <sup>+/-</sup> cardia as red circles. The grey area delimits fold-changes that are  
737 <1.5, statistically not different from the control cardia ( $p > 0.05$  after FDR correction). For each

738 data point, the *Glossina* gene ID and function based on BlastX annotation is depicted on the x-  
739 axis. **(C)** SG infection prevalence in normal and PM compromised flies. The circles depict the  
740 percentage of flies that harbor both gut and SG infections in the dsRNA-*chitin synthase* (dsCS)  
741 and control dsRNA-*gfp* (dsGFP) treatment groups. A total of 4 independent experiments were  
742 set-up for both dsGFP and dsCS. The black bars indicate the mean of the 4 experiments. A total  
743 number of 66 and 63 infected flies were observed in the dsGFP and dsCS treatments,

744 respectively. The dsCS treatment significantly increases trypanosome infection prevalence in  
745 tsetse's salivary glands (GLM, Wald-test  $p=0.01408$ ). Detailed countings and a complete  
746 statistical model are indicated in S3 Dataset. **(D)** Effects of cardia inf<sup>+/-</sup> and inf<sup>+/+</sup> extracts on  
747 PM integrity. Survival of flies was followed daily after *per os* treatment of 8 day-old flies with  
748 cardia extracts followed by *per os* treatment with *Serratia marcescens* 72 hours later. The  
749 Kaplan-Meier curves show fly survival over time: cardia inf<sup>+/-</sup> (red), cardia inf<sup>+/+</sup> (blue), or  
750 cardia rec<sup>-/-</sup> (green) and cardia non-inf (black). Statistical analysis was performed using a full  
751 regression model followed by a pairwise test (details in S3 Dataset). Different letters next to

752 figure legends represent significantly different curves ( $p < 0.05$ ). **(E-F)** Electron microscopy  
753 observations of trypanosomes within cardia inf<sup>+/+</sup>. (E) Trypanosomes accumulate where the  
754 foregut and midgut join and synthesize the PM. At this point, the PM is very diffused, which may  
755 facilitate parasites passage out of the ES. (F) The peritrophic matrix (PM) is ruptured (star) where  
756 trypanosomes aggregate as a cyst-like body. Tryp.: trypanosomes; ES: ectoperitrophic space; mv:  
757 midgut microvilli.

758

759 **Fig 4. Mitochondrial integrity in cardia *inf*<sup>+/+</sup> and *inf*<sup>+/-</sup>**

760 (A) Effect of infection on mitochondria related gene expression. Heatmap generated from the  
761 fold-changes between control and either *inf*<sup>+/-</sup> or *inf*<sup>+/+</sup> cardia. The \* denote the level of  
762 significance associated with the DE of specific transcripts (\**p*<0.05; \*\**p*<0.01; \*\*\**p*<0.001;  
763 \*\*\*\**p*<0.0001). (B-D) Ultrastructure of the sphincter myofibrils in control non-*inf* (B), *inf*<sup>+/-</sup> (C)  
764 and *inf*<sup>+/+</sup> (D) cardia. The white arrows show the mitochondria, the red arrowheads show  
765 patterns of mitochondria degradation and the yellow arrows show dilatation of sarcoplasmic  
766 reticulum. (E-G) Ultrastructure of the giant lipid-containing cells control non-*inf* (E), *inf*<sup>+/-</sup> (F)  
767 and *inf*<sup>+/+</sup> (G) cardia. The white arrows show the mitochondria and Ld denotes lipid droplets, Nu  
768 denotes nucleus. In both infection phenotypes, mitochondria cristae appear disorganized  
769 compared to control.

770

771 **Fig 5. Muscle structural integrity in cardia *inf*<sup>+/+</sup> and *inf*<sup>+/-</sup>**

772 (A) Effect of infection on cardia muscle related gene expression. Heatmap generated from the  
773 fold-changes between control and either *inf*<sup>+/-</sup> or *inf*<sup>+/+</sup> cardia. The \* denote the level of  
774 significance associated with the DE of specific transcripts (\**p*<0.05; \*\**p*<0.01; \*\*\**p*<0.001;  
775 \*\*\*\**p*<0.0001). (B-D) Ultrastructure of a sarcomere of muscles surrounding non-*inf* (B), *inf*<sup>+/-</sup>  
776 (C) and *inf*<sup>+/+</sup> (D) cardia. The red arrowhead indicates the Z band structure associated with  
777 sarcomeres.

778

779 **Fig 6. Influence of oxidative stress on infection status**

780 (A-B) Electron microscopy observations of trypanosomes within cardia *inf*<sup>+/-</sup>. (C) Comparison of  
781 peroxide levels in cardia non-infected (white circles), *inf*<sup>+/-</sup> (red circles) and *inf*<sup>+/+</sup> (blue circles)  
782 72 hours after a blood meal. Each dot represents an independent quantification of 10 pooled  
783 cardia. The black bars indicate the mean of the 3 replicates. Statistical analysis was conducted  
784 using a one-way ANOVA followed by a TukeyHSD posthoc test for pairwise comparisons.  
785 Statistical significance is represented by letters above each condition, with different letters  
786 indicating distinct statistical groups (*p*< 0.05). (D) SG infection prevalence in normal and anti-  
787 oxidant treated flies. The circles depict the percentage of flies that harbor both gut and SG  
788 infections in the Cysteine (10μM) and control treatment groups. A total of 4 independent groups  
789 were set-up for each treatment. The black bars indicate the mean of the 4 experiments. A total

790 number of 91 and 89 infected flies were observed in the control and Cysteine treatments,  
791 respectively. Cysteine treatment significantly increases trypanosome infection prevalence in  
792 tsetse's salivary glands (GLM, Wald-test  $p < 0.001$ ). Detailed countings and complete statistical  
793 model are indicated in S3 Dataset.

794

795 **Fig 7. Model illustrating permissive (inf+/+) and non-permissive (inf+/-) infection**  
796 **phenotypes in tsetse's cardia.**

797 African trypanosomes must pass through the tsetse vector in order to complete their lifecycle and  
798 infect a new vertebrate host. Following infection of tsetse's midgut, parasites either migrate to the  
799 fly's salivary glands where they subsequently transmit (permissive infection), or remain trapped  
800 in this environment and fail to advance (non-permissive infection). For a permissive infection to  
801 occur (inf+/+), trypanosomes must successfully circumvent several immunological barriers,  
802 including the cardia-synthesized peritrophic matrix (PM). In this situation, parasites that have  
803 accumulated in the ectoperitrophic space (ES) (1) of the cardia traverse the structurally  
804 compromised PM at its site of synthesis (where the matrix is most diffuse and fragile) (2). During  
805 this process, clumps of parasites end up enclosed within layers of the PM, but force their way out  
806 by breaking through the structure's electron-dense layer (3). Parasites that have successfully  
807 translocated to the cardia lumen then migrate to tsetse's salivary glands (4). Why the PM is  
808 structurally compromised in the permissive state is currently unknown. However, trypanosomes  
809 may secrete molecules that are taken up by PM synthesizing cells (5). These molecules may  
810 subsequently inhibit expression of genes that encode proteinaceous components (Pro1, Pro3, etc)  
811 of the matrix and trypanocidal reactive oxygen intermediates (ROIs). In non-permissive infection  
812 (inf+/-), a small number of parasites are found to have successfully reach the cardia, and most of  
813 them appear dead or damaged (6). The inability for the parasite to sustain in the cardia  
814 environment seems caused by a higher concentration of ROIs compared to inf+/+ cardia. The  
815 regulation of the parasite population comes at the price of collateral damages to the cardia tissues,  
816 especially to the muscles lining the outer boarder of the organ, as they present sarcoplasmic  
817 dilatation and mitochondrial vacuolation and swelling (7). In the cardia with non-permissive  
818 phenotype, PM synthesis is not affecting, probably due to the lack of trypanosome-derived  
819 molecules interfering with its production (8).

820

## 821 **Supporting Information**

822 **S1 Fig. Overview of cardia transcriptomes.** (A) For each replicate of each infection status,  
823 number of RNA-seq reads: in total (blue), after quality control (purple), mapping uniquely to  
824 tsetse *Glossina morsitans morsitans* (bright red), mapping non-uniquely to tsetse *Glossina*  
825 *morsitans morsitans* (pale red), mapping uniquely to *Trypanosoma brucei brucei* 927 (dark  
826 green), mapping non-uniquely to *Trypanosoma brucei brucei* 927 (bright green). (B) Proportion  
827 of total trimmed reads mapping to *Glossina morsitans morsitans* uniquely (bright red) and non-  
828 uniquely (pale red) and mapping to *Trypanosoma brucei brucei* 927 uniquely (dark green) and  
829 non-uniquely (bright green). (C) Proportion of *Glossina morsitans morsitans* transcripts for  
830 which 0-1,000 (blue), 1,001-10,000 (yellow), 10,001-100,000 (pink) or 100,001+ (purple) reads  
831 are mapping to.

832  
833 **S2 Fig. Parasite quantity in midgut and cardia.** (A) Number of parasites in the cardia of inf+/-  
834 (red) and inf+/+ (blue) flies. (B) Number of parasites in the midgut of inf+/- (red) and inf+/+  
835 (blue) flies. The black bar represents the mean of the replicates for each treatment. Midgut and  
836 cardia were dissected from eight 40 days-old females. Parasites were counted using a  
837 hemocytometer. Statistical analyses were carried out using the non-parametrical Mann-Whitney  
838 rank test.

839  
840 **S3 Fig. Ultrastructure of the cardia.** (A) Transversal section of a non-infected cardia. Two  
841 pictures of the same cardia were merged to produce a larger picture. B, C, D, E and F locate the  
842 magnification of cardia tissues. (B) Midgut tissue delimiting the outer part of the cardia. (C)  
843 Foregut tissue invagination within cardia, corresponding to the stomodeal valve in other insects.  
844 (D) Myofibrils assembled to form the sphincter surrounding the foregut opening in the cardia. (E)  
845 Lipid-containing cells above foregut tissue and cover by a thin layer of muscles. (F) Foregut tube  
846 coming out of the cardia. Lu, Lumen; Mg, Midgut; S-Mg, PM-Secreting part of Midgut; Fg,  
847 Foregut; mu, muscle; Lc, Lipid-containing cells; mv, microvilli; ES, Ecotperitrophic Space.

848  
849 **S4 Fig. Expression of *chitin synthase* after RNAi treatment.** Expression of *chitin synthase*  
850 gene relative to the expression of the housekeeping gene  *$\beta$ -tubulin* after treatment with dsRNA-

851 *gfp* (control; white circles) and dsRNA-*chitin synthase* (dsCS; grey circles). *chitin synthase*  
852 expression is significantly decreased after RNAi knockdown (Student t-test,  $p= 0.011$ ).

853  
854 **S5 Fig. Ultrastructure of trypanosomes aggregations in *inf+/+* cardia.** (A) Aggregation of  
855 trypanosomes in-between the foregut invagination (characterized by its chitin layer) and the  
856 midgut (characterized by the microvilli, mv) below the site of the PM synthesis. The compact  
857 aggregate of parasite is observed in the lumen as well as in the ectoperitrophic space (ES). (B)  
858 Close-up of the A panel where the PM appears as compressed in-between parasites. (C)  
859 Formation of a cyst-like body at the site of the PM synthesis. Here, the PM appears very diffused,  
860 which may be exploited by the parasites to evade the ES. (D) Cyst-like bodies are observed at  
861 several points in the cardia, where parasites are enclosed in-between 2 distinguishable PM layers:  
862 a thick electron-lucent part on the ES side and a thin electron-dense part on the lumen side. The  
863 electron-dense layer appears broken at some points (arrowhead, see also Fig 3F), where parasites  
864 may evade from the PM. (E) Rupture of the PM electron-dense layer are also observed along the  
865 PM in the cardia (arrowhead). This may be the result of parasites cyst-like bodies that have  
866 successfully escape the PM. (F) The PM lacks its electron-dense layer on some portion longing  
867 the cardia midgut epithelium, resulting presumably from the event describe above.

868  
869 **S6 Fig. Ultrastructure of muscles and mitochondria damages in cardia *inf+/-*.** (A)  
870 Transversal section of muscle tissues (mu) composing the sphincter. (B-D) Longitudinal section  
871 of muscles (mu) layering the midgut tissues. Black arrowheads: healthy mitochondria; red  
872 arrowheads: vacuolation of mitochondria; yellow arrow: sarcoplasmic dilatation; green  
873 arrowheads: swelling mitochondria.

874  
875 **S1 Dataset. Detailed results and analyses fo each transcriptome.**

876  
877 **S2 Dataset. GO terms analysis results.**

878  
879 **S3 Dataset. Detailed results and statistics for infection experiments and oxidative stress**  
880 **quantification.**

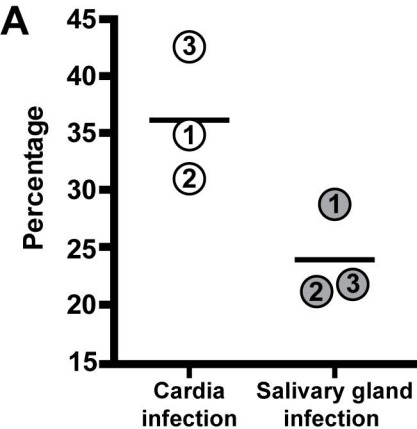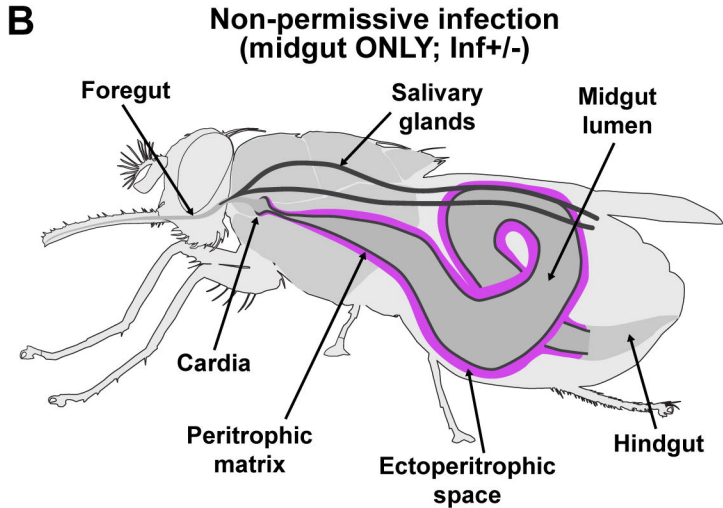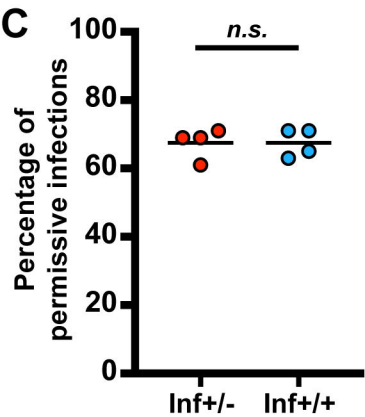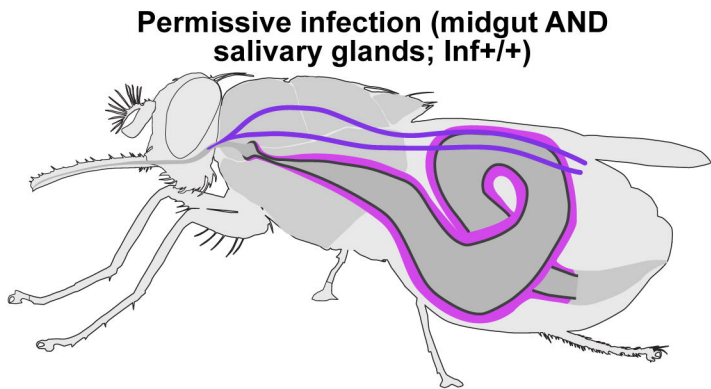

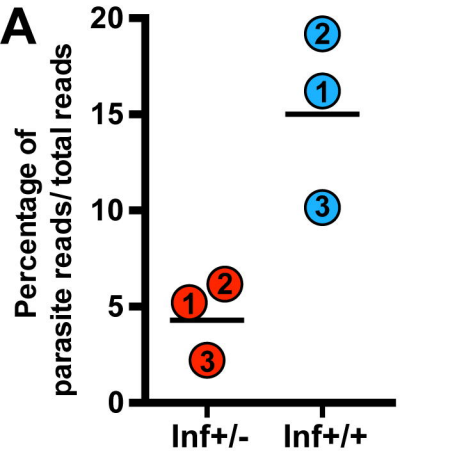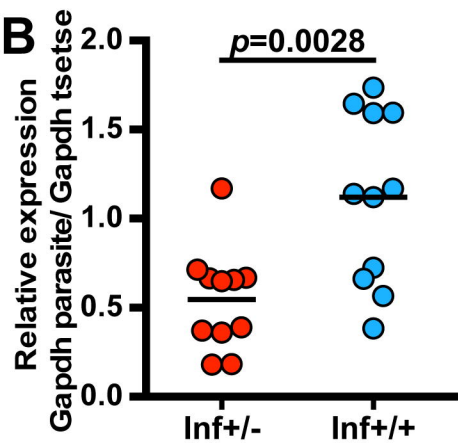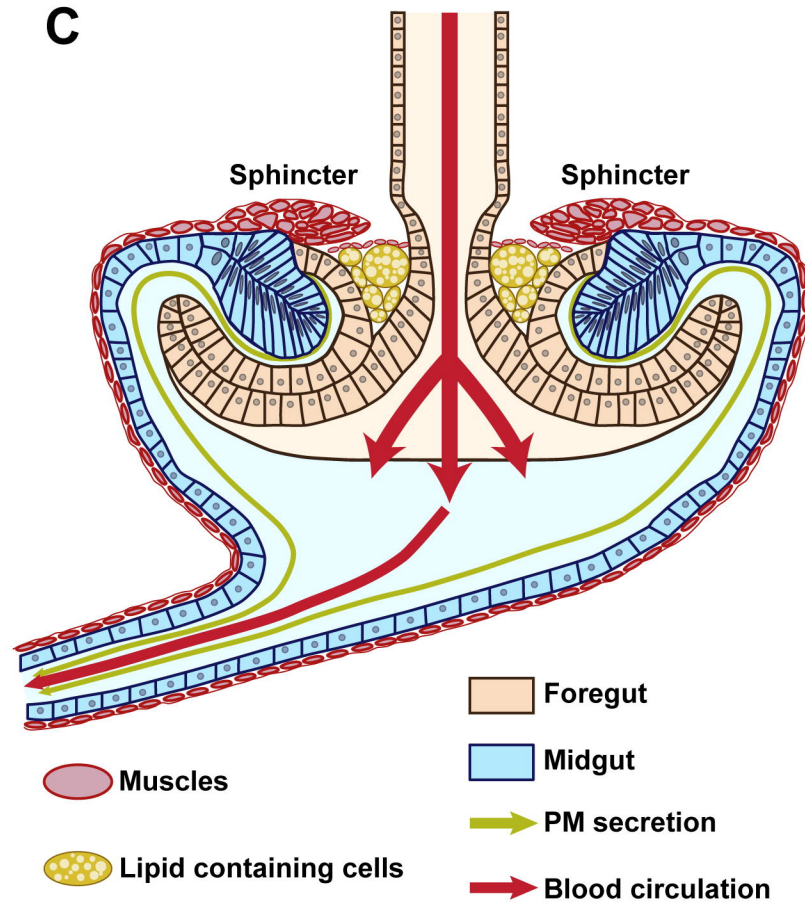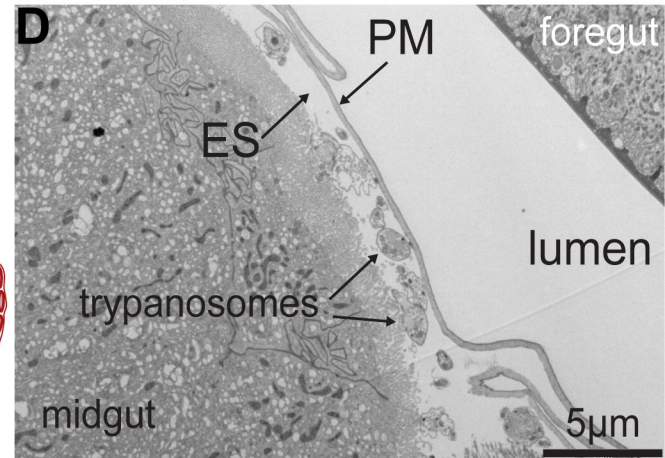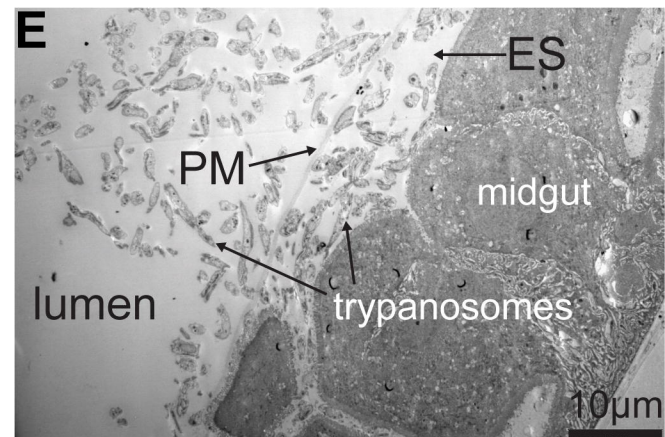



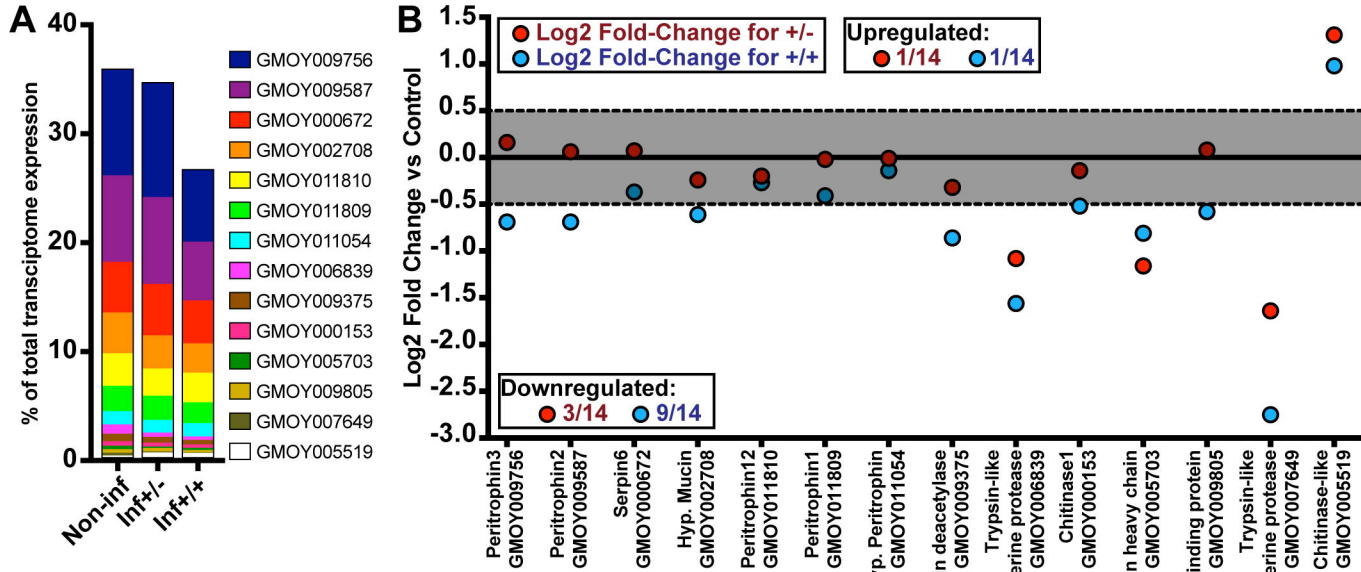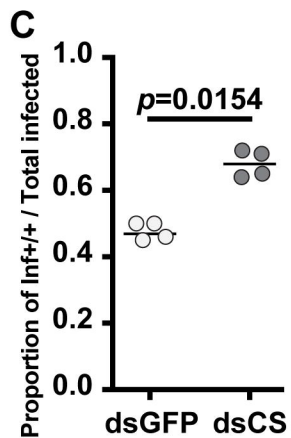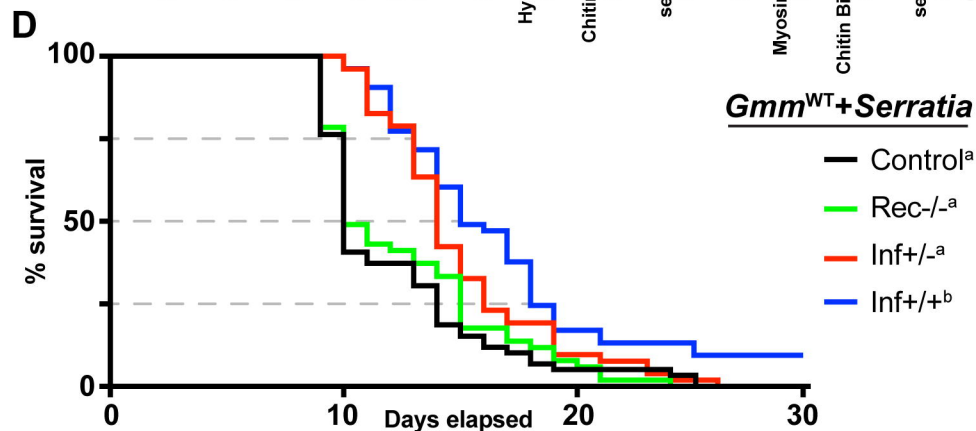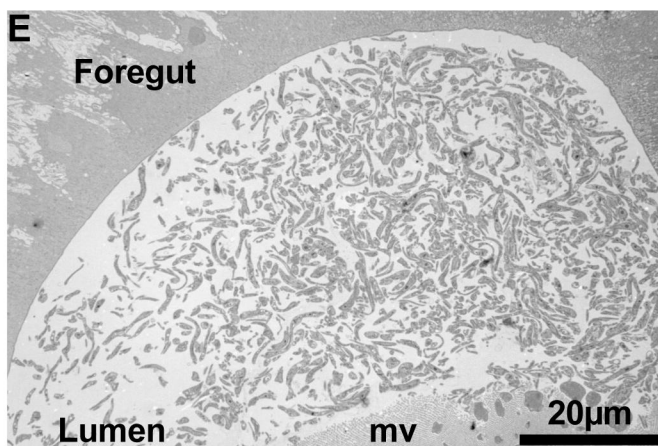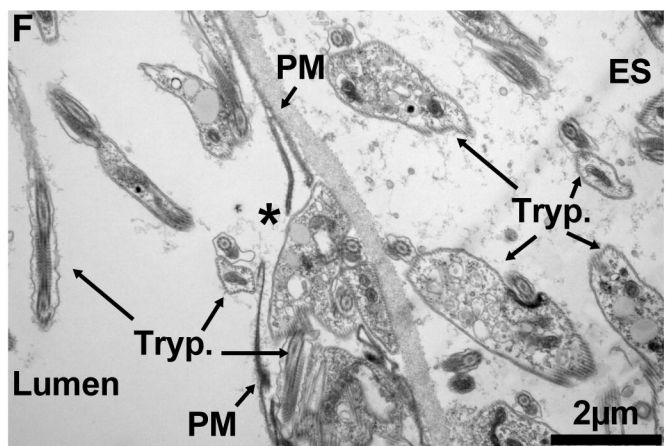

**A**

|                                                                       | Inf+/- | Inf+/+ |
|-----------------------------------------------------------------------|--------|--------|
| Delta-1-pyrroline-5-carboxylate synthase (GMOY006294)                 | ****   | ***    |
| Carnitine O-palmitoyltransferase 1 (GMOY005222)                       | ****   | **     |
| Acyl-Coa Dehydrogenase, mitochondrial (GMOY010365)                    | ****   |        |
| Pyruvate carboxylase (GMOY004732)                                     | ****   | **     |
| Acyl-CoA dehydrogenase (GMOY011989)                                   | ****   |        |
| Electron transfer flavoprotein subunit beta (GMOY007346)              | ****   | **     |
| Pyruvate carboxylase (GMOY009852)                                     | ***    | **     |
| Isocitrate dehydrogenase NADP (GMOY004931)                            | ***    | ****   |
| Electron transfer flavoprotein-ubiquinone oxidoreductase (GMOY003882) | ****   |        |
| Trifunctional enzyme subunit alpha (GMOY004743)                       | ****   |        |
| Acyl-CoA dehydrogenase (GMOY004937)                                   | ***    |        |
| Fatty acid synthase (GMOY004926)                                      | **     |        |
| Acetyl-CoA acyltransferase (GMOY004591)                               | ***    |        |
| ATP-citrate synthase (GMOY006600)                                     | ***    |        |
| ATP synthase subunit gamma (GMOY000582)                               | ***    |        |
| Enoyl-CoA hydratase (GMOY001589)                                      | **     | *      |
| Malate dehydrogenase (GMOY011652)                                     | **     |        |
| Bellwether (GMOY008764)                                               | *      | *      |
| Cytochrome b-c1 complex subunit 2 (GMOY002897)                        | *      | *      |
| Cytochrome c oxidase subunit 5A (GMOY003541)                          | *      |        |
| Succinyl-CoA:3-ketoacid coenzyme A transferase 1 (GMOY002902)         | *      |        |
| ATP synthase lipid binding protein (GMOY005639)                       | *      |        |
| NADH-ubiquinone oxidoreductase 49 kDa subunit (GMOY005872)            | *      |        |

Log<sub>2</sub> fold-change against non-inf: -1.5 -1 -0.5 0 0.5 1 1.5

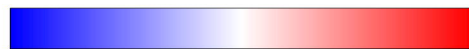**B**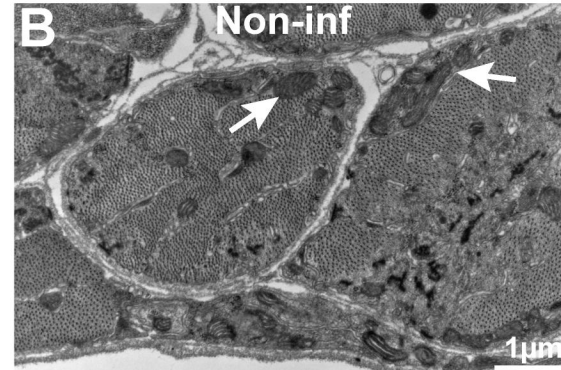**E**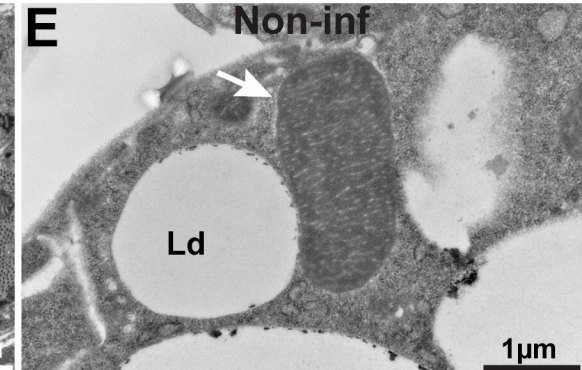**C**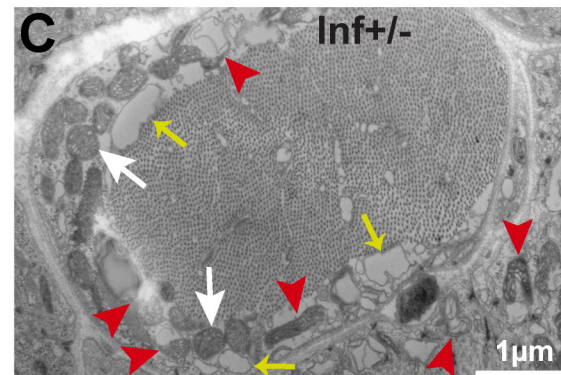**F**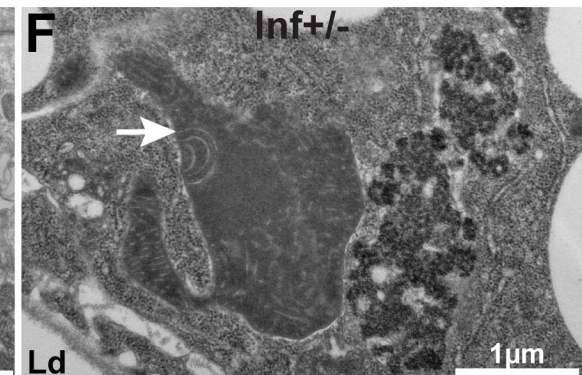**D**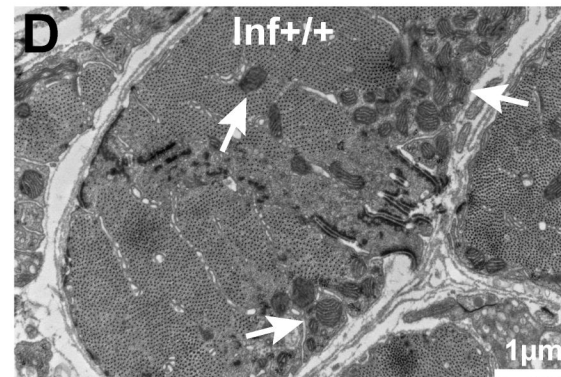**G**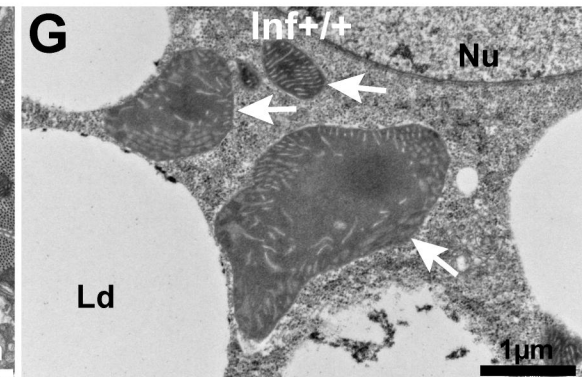

**A****Inf+/- Inf+/+**

|                                              |      |     |
|----------------------------------------------|------|-----|
| Paramyosin (GMOY002377)                      | **** | **  |
| Myosin regulatory light chain 2 (GMOY011554) | **** | *   |
| Myosin light chain alkali (GMOY005682)       | **** |     |
| Muscle LIM protein (GMOY009237)              | **** |     |
| Muscle-specific protein 20 (GMOY010913)      | **** |     |
| Skeletal muscle troponin T (GMOY010298)      | **   |     |
| Troponin I (GMOY007746)                      | **   | *** |
| Tropomyosin-like (GMOY003929)                | **   |     |

Log<sub>2</sub> fold-change

against non-inf:

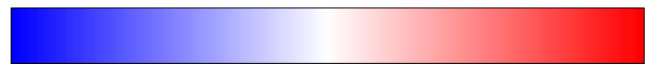

-1.5

-1

-0.5

0

0.5

1

1.5

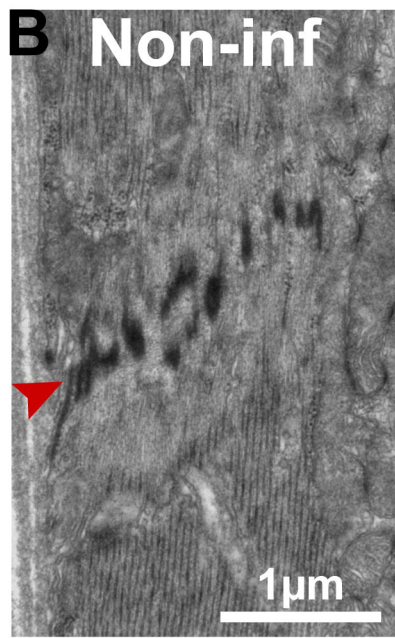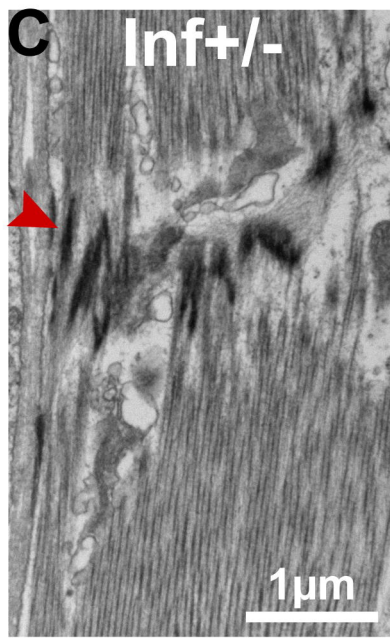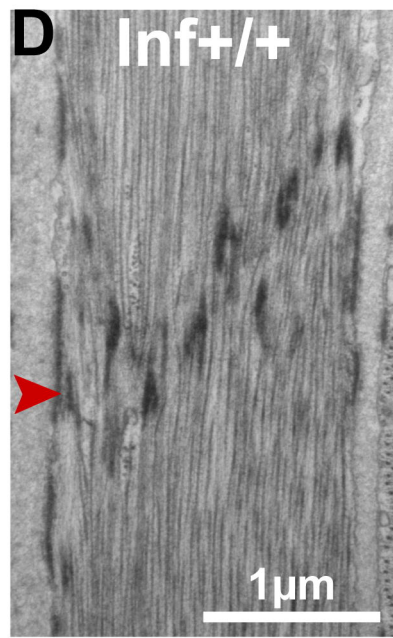

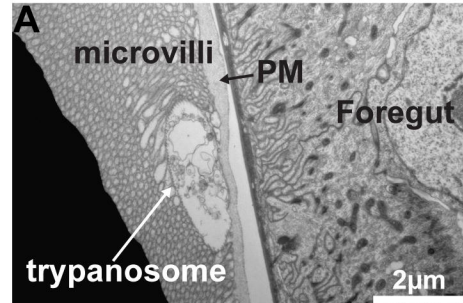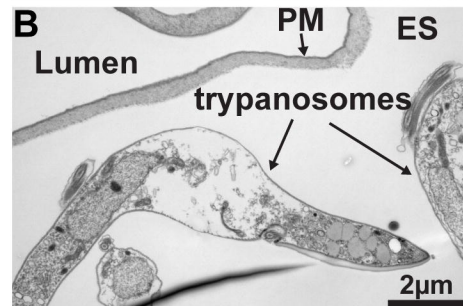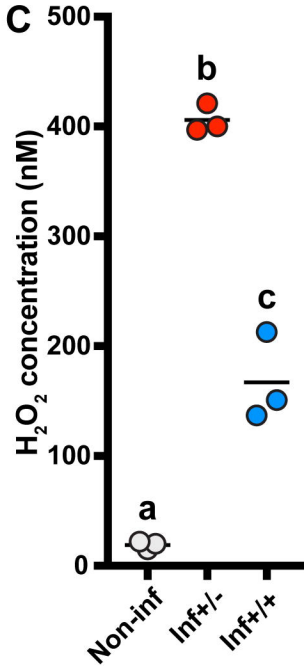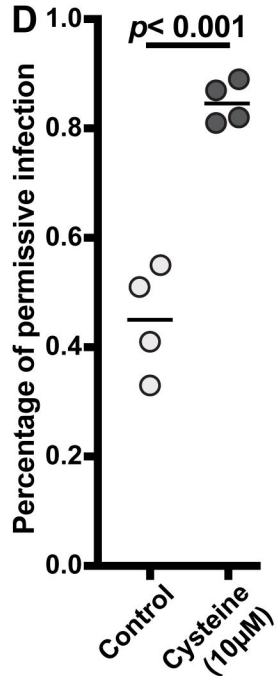

# Permissive infection (inf+/+)

# Non-Permissive infection (inf+/-)

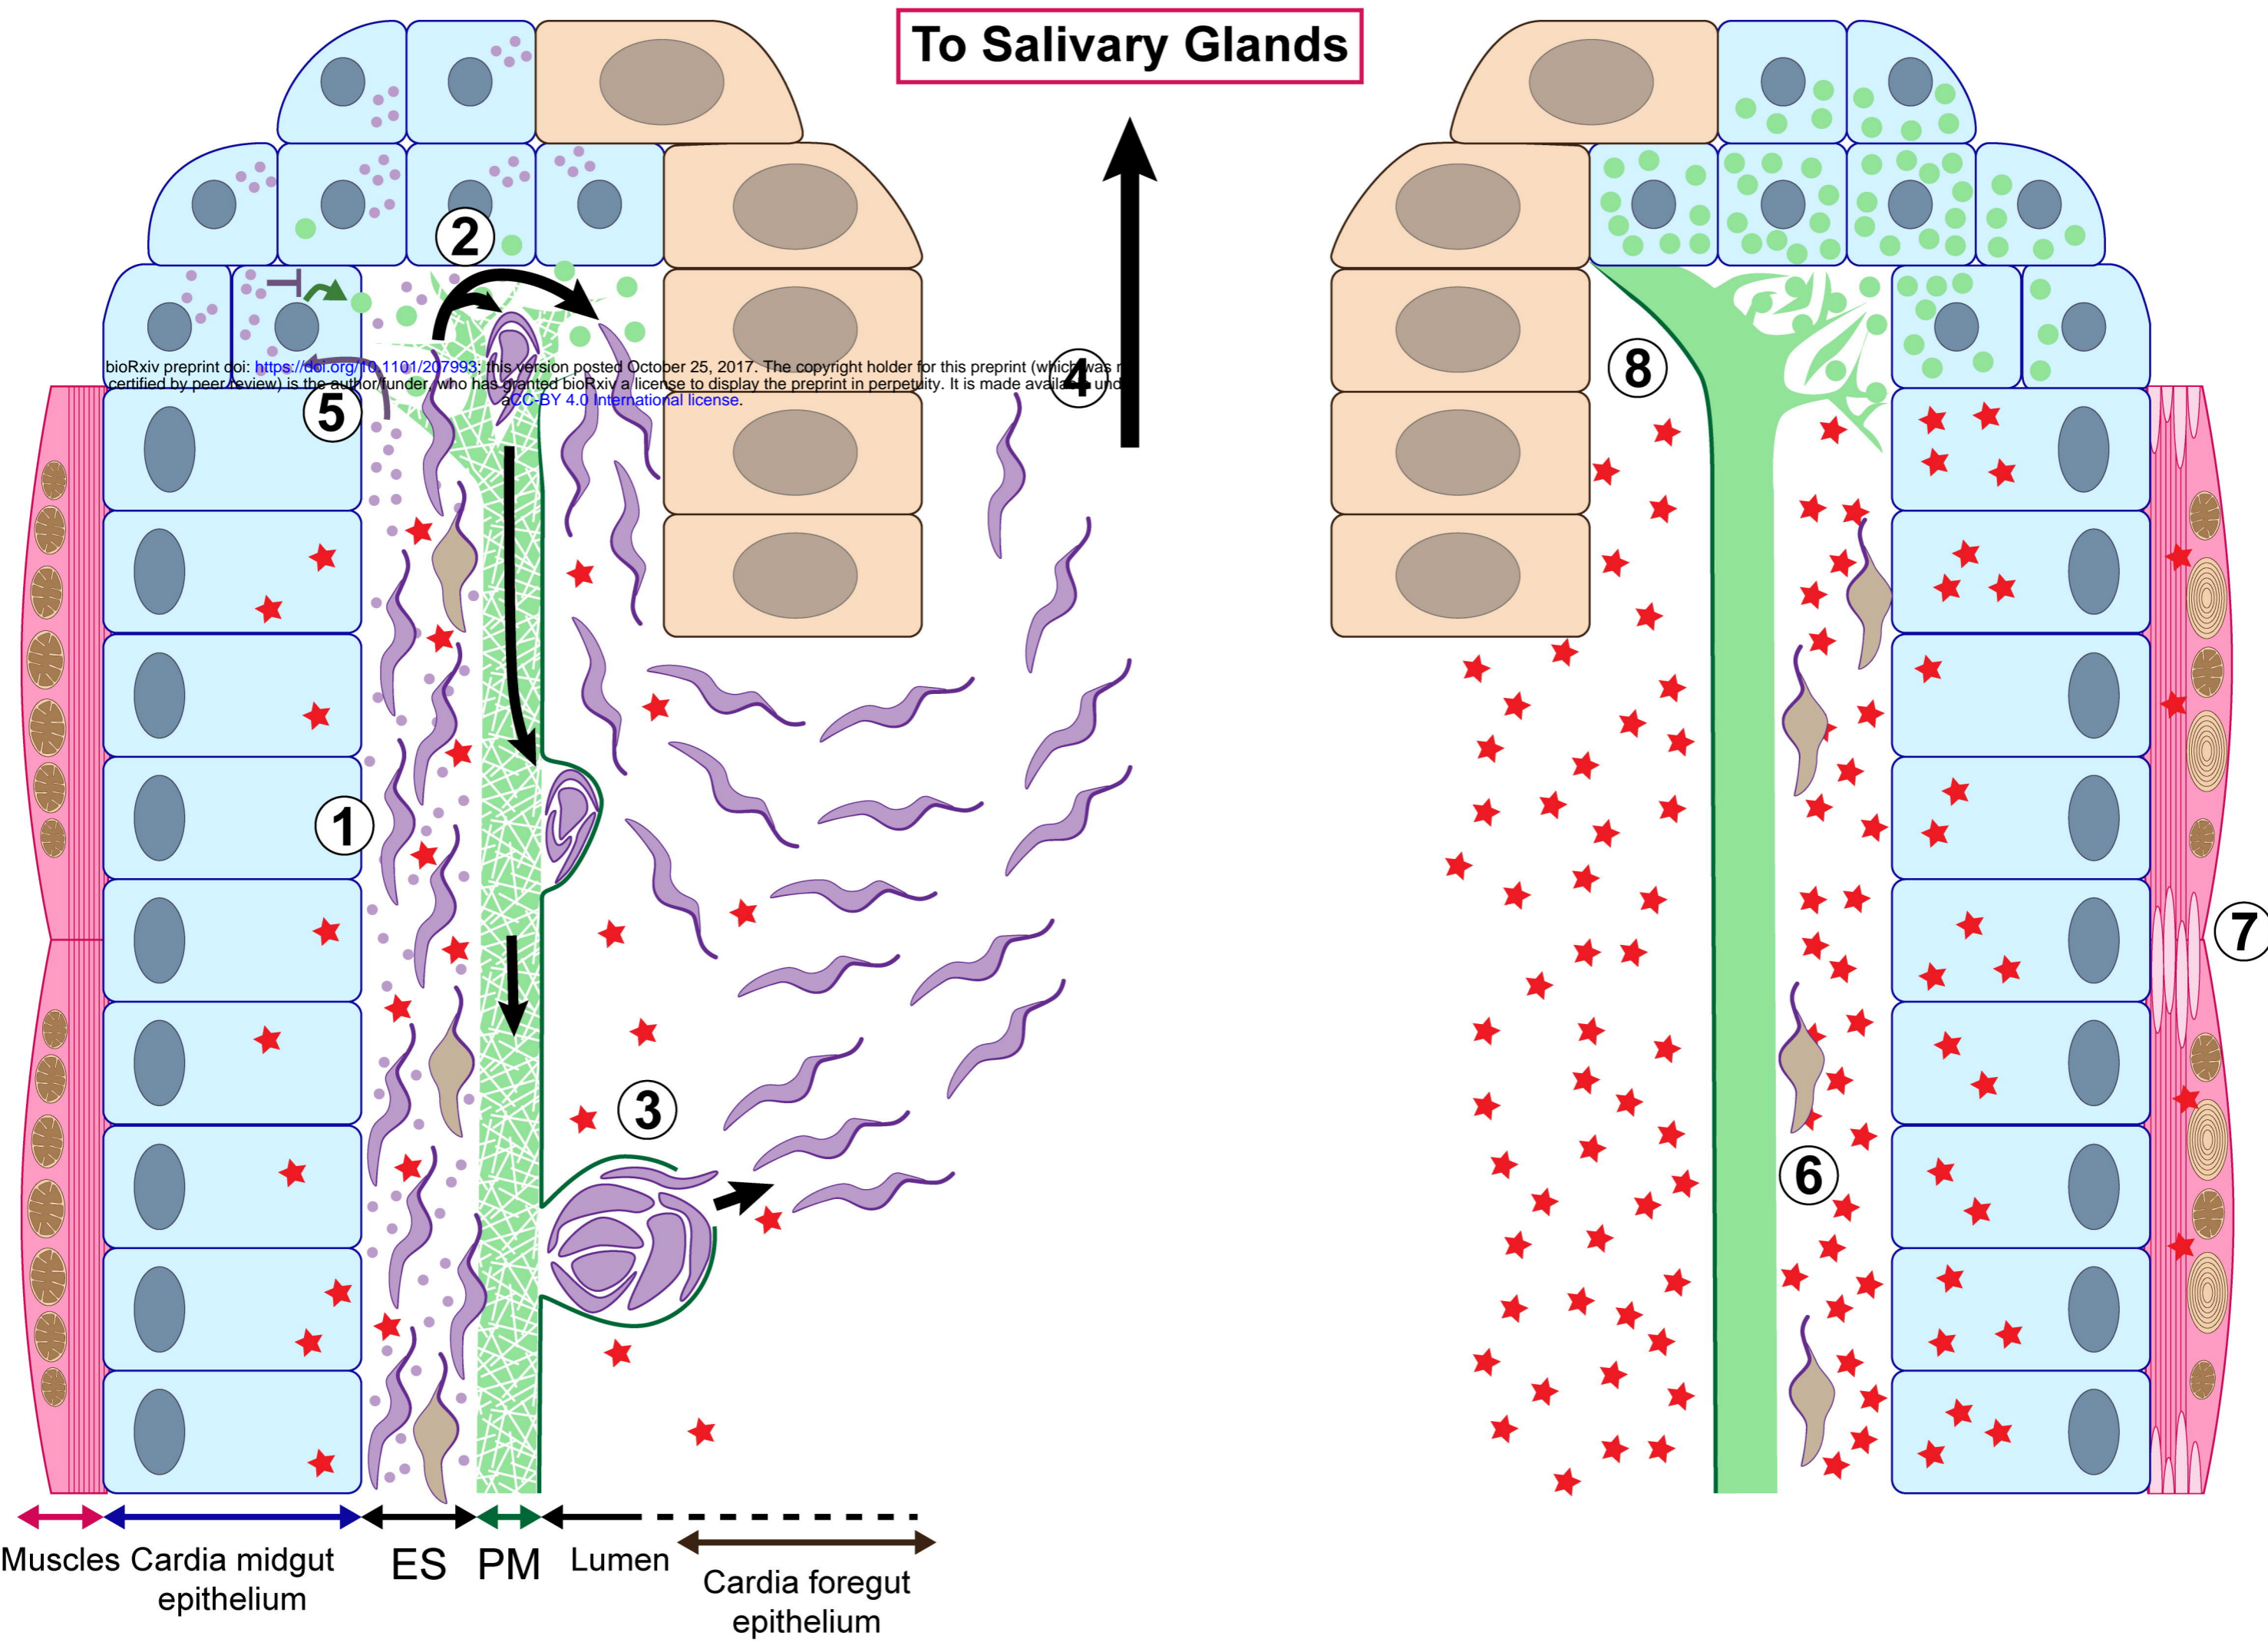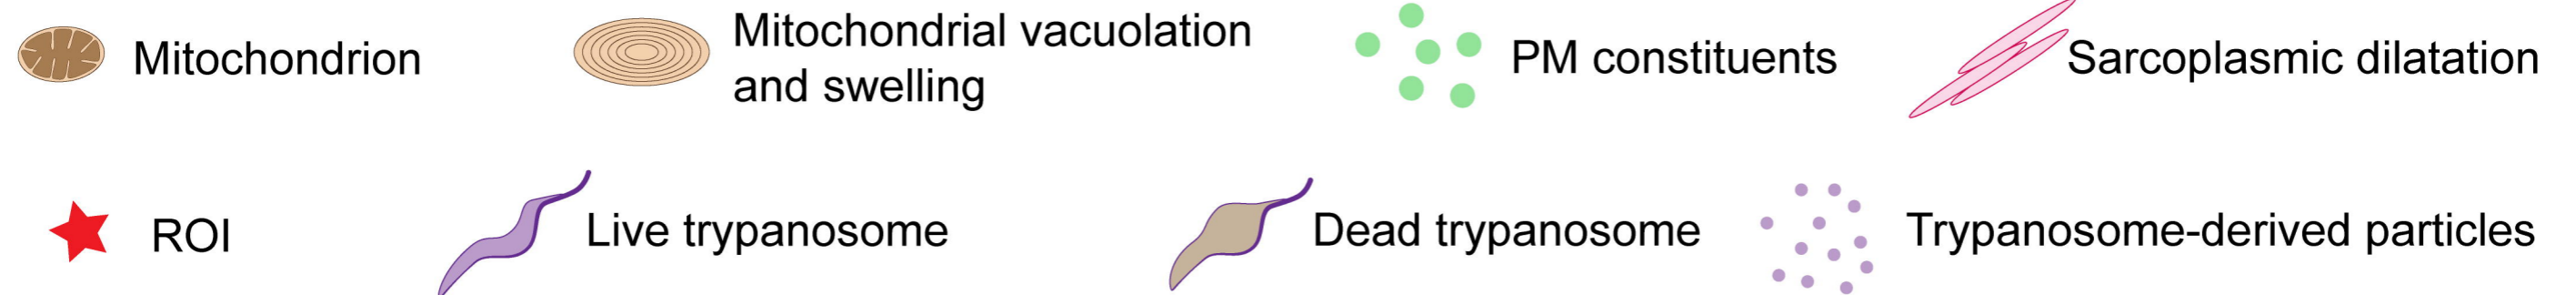

Source: https://www.biorxiv.org/content/10.1101/207993v1.full.pdf
